# Supplementary material for: The structure of human GCN2 reveals a parallel, back-to-back kinase dimer with a plastic DFG activation loop motif
Source: Oxford University Press journal article supplement (doi:10.1042/bcj20190196), 2020-01-17
Supplement: bcj-2019-0196_supp.pdf [file bcj-2019-0196_supp.pdf]

## Supplementary Figures

### Supplementary Figure 1A

LC-MS of GCN2(S577-T1020,ΔA663-P788) to highlight multiple phosphorylations.

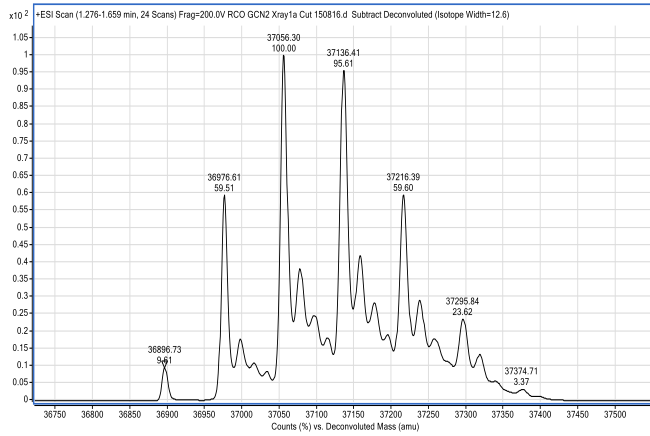

### Supplementary Figure 1B

LC-MS of GCN2(S577-T1020,ΔA663-P788) to highlight lack of phosphorylations.

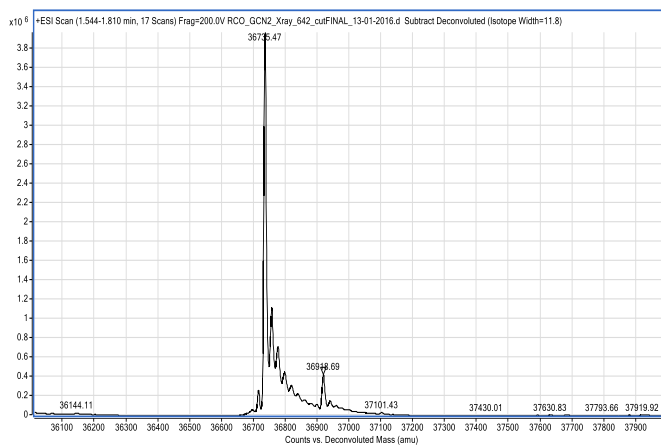

### Supplementary Figure 2

SEC-MALS of human GCN2 Kinase Domain crystallization construct, GCN2 S577-T1020,  $\Delta$ A663-P788 (2mg/mL), showing an average molecular weight of 38.5 kDa (consistent with a monomer)

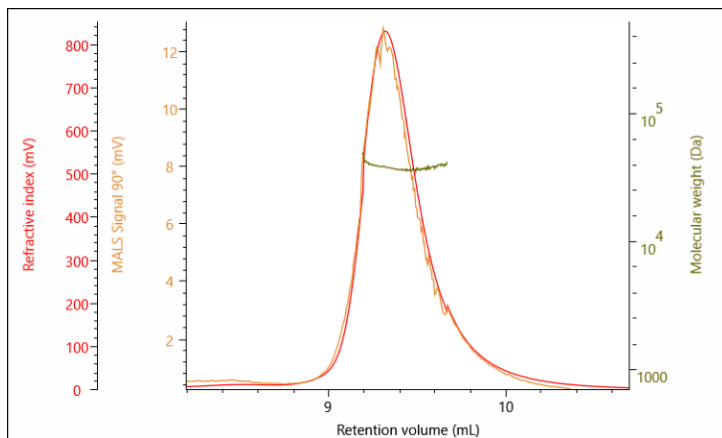

### Supplementary Figure 3

Reaction progress curves for various GCN2 constructs determined according to the Biochemical Activity Assay session (Supplementary Materials). All four kinase domain constructs show relatively low levels of activity, with the highly phosphorylated construct #624 being most active, followed by partially phosphorylated,  $\Delta$  loop & dephosphorylated KD constructs. Full length protein (FL) was tested at 4X lower concentration (5 nM) and showed minimal activity. However, in the presence of tRNA and after an ~20 minute lag which we attribute to an autophosphorylation step, the FL protein showed a dramatic increase in activity. (Datapoints above 5 nM p-eIF2S1 may be out of linear detection range). Data shown is an average of 3 independent experiments. Error bars are  $\pm$  SEM.

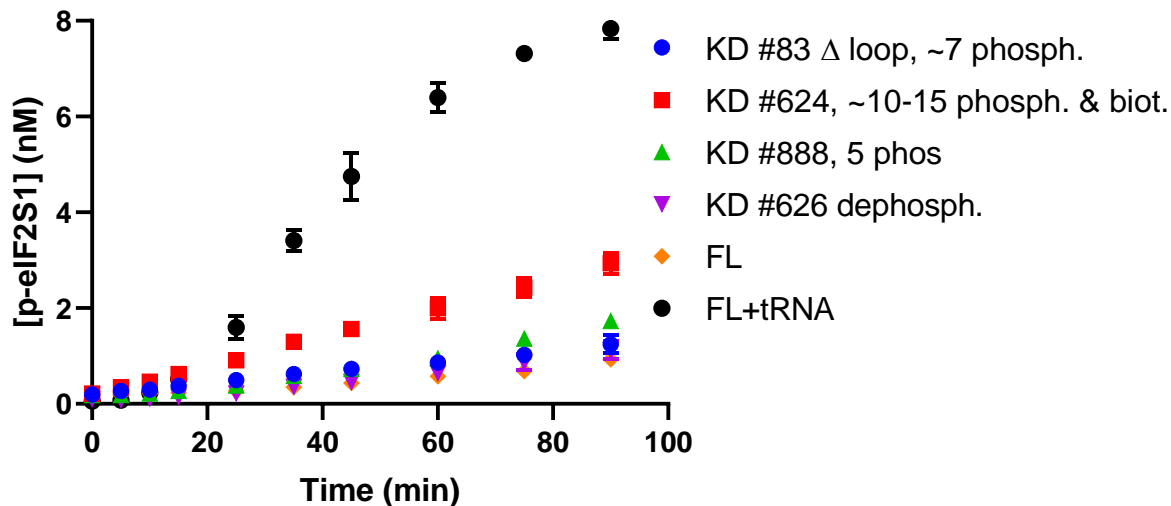

Supplementary Figure 4

Interaction map of Dovinitib:GCN2

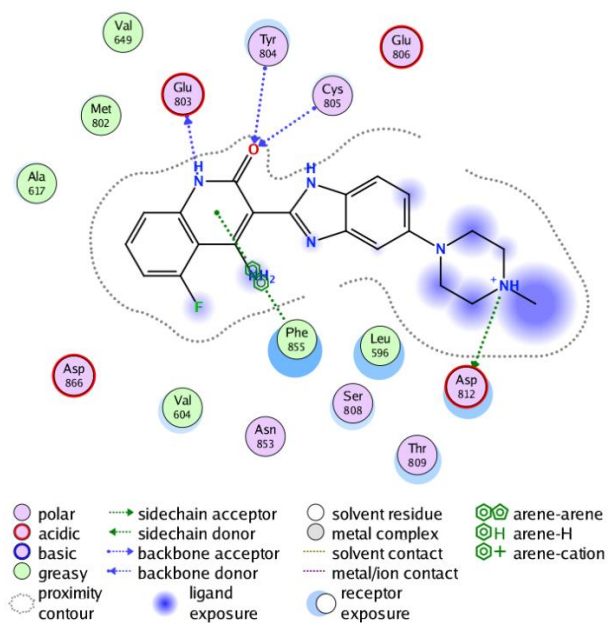

Supplementary Figure 5

Representative interactions of GCN2:(2S)-N-[(1S)-1-(4-[[6-(4-pyridinyl)-2-quinazolinyl]amino}phenyl)ethyl]-2 piperidinecarboxamide

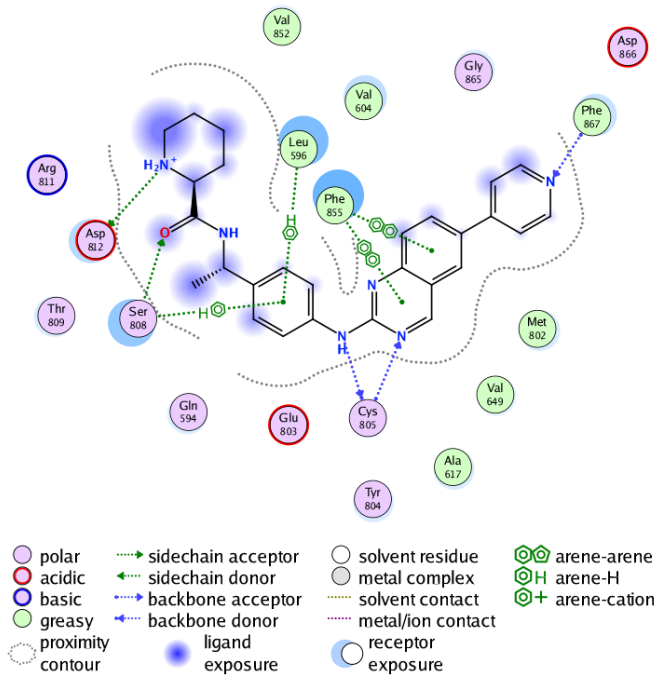

### Supplementary Figure 6

Human GCN2 (pink) adopts a dimeric arrangement similar to the one adopted by PKR (yellow)<sup>13</sup>. When compared to the parallel dimer of PKR, GCN2 is more closed.

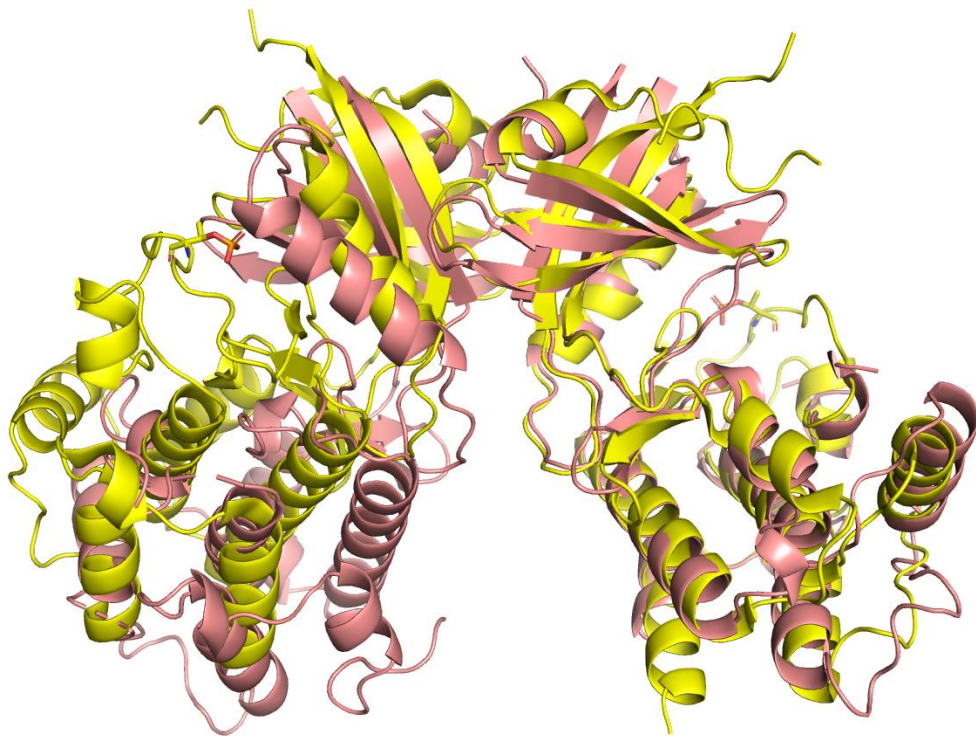

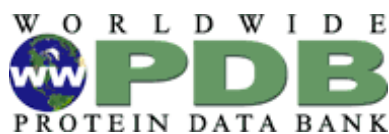

# Preliminary Full wwPDB X-ray Structure Validation Report ⓘ

Feb 20, 2019 – 09:53 am GMT

Deposition ID : D\_1292100734  
PDB ID : *(not yet assigned)*

This is a Preliminary Full wwPDB X-ray Structure Validation Report.

This report is produced by the wwPDB Deposition System during initial deposition but before annotation of the structure.

We welcome your comments at [validation@mail.wwpdb.org](mailto:validation@mail.wwpdb.org)

A user guide is available at

<https://www.wwpdb.org/validation/2017/XrayValidationReportHelp>

with specific help available everywhere you see the ⓘ symbol.

---

The following versions of software and data (see [references ⓘ](#)) were used in the production of this report:

|                                |   |                                                                    |
|--------------------------------|---|--------------------------------------------------------------------|
| MolProbity                     | : | 4.02b-467                                                          |
| Mogul                          | : | 1.7.3 (157068), CSD as539be (2018)                                 |
| Xtrriage (Phenix)              | : | 1.13                                                               |
| EDS                            | : | 2.1                                                                |
| Percentile statistics          | : | 20171227.v01 (using entries in the PDB archive December 27th 2017) |
| Refmac                         | : | 5.8.0158                                                           |
| CCP4                           | : | 7.0 (Gargrove)                                                     |
| Ideal geometry (proteins)      | : | Engh & Huber (2001)                                                |
| Ideal geometry (DNA, RNA)      | : | Parkinson et al. (1996)                                            |
| Validation Pipeline (wwPDB-VP) | : | 2.1                                                                |

# 1 Overall quality at a glance i

The following experimental techniques were used to determine the structure:

*X-RAY DIFFRACTION*

The reported resolution of this entry is 2.30 Å.

Percentile scores (ranging between 0-100) for global validation metrics of the entry are shown in the following graphic. The table shows the number of entries on which the scores are based.

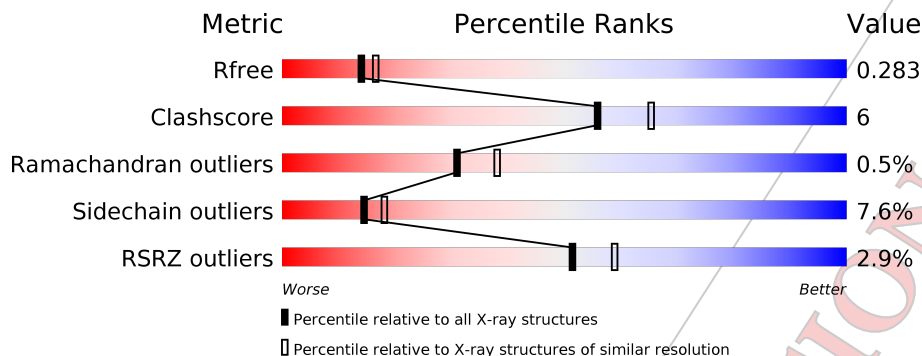

| Metric                | Whole archive<br>(#Entries) | Similar resolution<br>(#Entries, resolution range(Å)) |
|-----------------------|-----------------------------|-------------------------------------------------------|
| $R_{free}$            | 111664                      | 4477 (2.30-2.30)                                      |
| Clashscore            | 122126                      | 5072 (2.30-2.30)                                      |
| Ramachandran outliers | 120053                      | 5022 (2.30-2.30)                                      |
| Sidechain outliers    | 120020                      | 5021 (2.30-2.30)                                      |
| RSRZ outliers         | 108989                      | 4374 (2.30-2.30)                                      |

The table below summarises the geometric issues observed across the polymeric chains and their fit to the electron density. The red, orange, yellow and green segments on the lower bar indicate the fraction of residues that contain outliers for  $\geq 3$ , 2, 1 and 0 types of geometric quality criteria. A grey segment represents the fraction of residues that are not modelled. The numeric value for each fraction is indicated below the corresponding segment, with a dot representing fractions  $\leq 5\%$ . The upper red bar (where present) indicates the fraction of residues that have poor fit to the electron density. The numeric value is given above the bar.

| Mol | Chain | Length | Quality of chain   |
|-----|-------|--------|--------------------|
| 1   | A     | 320    | <br>2% 64% 11% 23% |
| 1   | B     | 320    | <br>3% 66% 11% 22% |
| 1   | C     | 320    | <br>3% 65% 13% 22% |
| 1   | D     | 320    | <br>2% 68% 11% 21% |
| 1   | E     | 320    | <br>4% 59% 18% 22% |
| 1   | F     | 320    | <br>% 65% 13% 21%  |

Continued on next page...

Continued from previous page...

| Mol | Chain | Length | Quality of chain                                                                                         |
|-----|-------|--------|----------------------------------------------------------------------------------------------------------|
| 1   | G     | 320    | 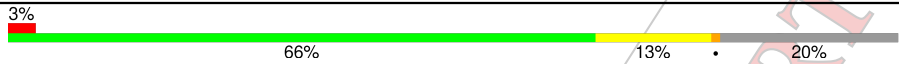 <p>3% 66% 13% 20%</p> |
| 1   | H     | 320    |  <p>68% 13% 19%</p>    |

PRELIMINARY VALIDATION REPORT

## 2 Entry composition i

There are 4 unique types of molecules in this entry. The entry contains 16055 atoms, of which 0 are hydrogens and 0 are deuteriums.

In the tables below, the ZeroOcc column contains the number of atoms modelled with zero occupancy, the AltConf column contains the number of residues with at least one atom in alternate conformation and the Trace column contains the number of residues modelled with at most 2 atoms.

- Molecule 1 is a protein called general control nonderepressible 2 (GCN2 ).

| Mol | Chain | Residues | Atoms         |           |          |          |        | ZeroOcc | AltConf | Trace |
|-----|-------|----------|---------------|-----------|----------|----------|--------|---------|---------|-------|
|     |       |          | Total         | C         | N        | O        | S      |         |         |       |
| 1   | A     | 245      | Total<br>1865 | C<br>1205 | N<br>314 | O<br>339 | S<br>7 | 0       | 0       | 0     |
| 1   | B     | 249      | Total<br>1934 | C<br>1248 | N<br>330 | O<br>349 | S<br>7 | 0       | 0       | 0     |
| 1   | C     | 249      | Total<br>1928 | C<br>1249 | N<br>326 | O<br>346 | S<br>7 | 0       | 0       | 0     |
| 1   | D     | 254      | Total<br>1993 | C<br>1289 | N<br>336 | O<br>361 | S<br>7 | 0       | 0       | 0     |
| 1   | E     | 249      | Total<br>1952 | C<br>1262 | N<br>334 | O<br>349 | S<br>7 | 0       | 0       | 0     |
| 1   | F     | 254      | Total<br>1990 | C<br>1285 | N<br>339 | O<br>358 | S<br>8 | 0       | 0       | 0     |
| 1   | G     | 257      | Total<br>2005 | C<br>1293 | N<br>339 | O<br>365 | S<br>8 | 0       | 0       | 0     |
| 1   | H     | 259      | Total<br>2024 | C<br>1306 | N<br>342 | O<br>367 | S<br>9 | 0       | 0       | 0     |

- Molecule 2 is a ligand with the chemical component id INH but its atom names do not match the existing wwPDB Chemical Component Dictionary definition for INH. Consequently no firm identification of ligand chemistry can be made. Once the structure is annotated then an identification and diagram will be given here.

| Mol | Chain | Residues | Atoms       |         |        |        | ZeroOcc | AltConf |
|-----|-------|----------|-------------|---------|--------|--------|---------|---------|
|     |       |          | Total       | C       | N      | O      |         |         |
| 2   | I     | 1        | Total<br>34 | C<br>27 | N<br>6 | O<br>1 | 0       | 0       |
| 2   | I     | 1        | Total<br>34 | C<br>27 | N<br>6 | O<br>1 | 0       | 0       |
| 2   | I     | 1        | Total<br>34 | C<br>27 | N<br>6 | O<br>1 | 0       | 0       |
| 2   | I     | 1        | Total<br>34 | C<br>27 | N<br>6 | O<br>1 | 0       | 0       |
| 2   | I     | 1        | Total<br>34 | C<br>27 | N<br>6 | O<br>1 | 0       | 0       |

*Continued on next page...*



Continued from previous page...

| Mol | Chain | Residues | Atoms |    |   |   | ZeroOcc | AltConf |
|-----|-------|----------|-------|----|---|---|---------|---------|
|     |       |          | Total | C  | N | O |         |         |
| 2   | I     | 1        | Total | C  | N | O | 0       | 0       |
|     |       |          | 34    | 27 | 6 | 1 |         |         |
| 2   | I     | 1        | Total | C  | N | O | 0       | 0       |
|     |       |          | 34    | 27 | 6 | 1 |         |         |
| 2   | I     | 1        | Total | C  | N | O | 0       | 0       |
|     |       |          | 34    | 27 | 6 | 1 |         |         |

- Molecule 3 is DIMETHYL SULFOXIDE (three-letter code: DMS) (formula: C<sub>2</sub>H<sub>6</sub>OS).

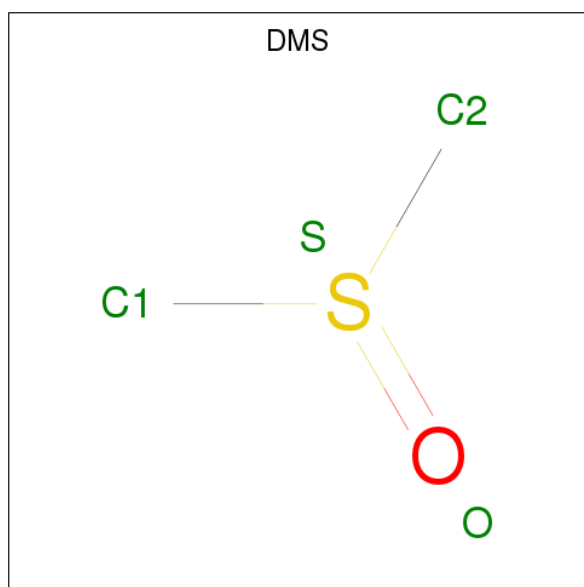

| Mol | Chain | Residues | Atoms |   |   |   | ZeroOcc | AltConf |
|-----|-------|----------|-------|---|---|---|---------|---------|
|     |       |          | Total | C | O | S |         |         |
| 3   | K     | 1        | Total | C | O | S | 0       | 0       |
|     |       |          | 4     | 2 | 1 | 1 |         |         |
| 3   | K     | 1        | Total | C | O | S | 0       | 0       |
|     |       |          | 4     | 2 | 1 | 1 |         |         |

- Molecule 4 is water.

| Mol | Chain | Residues | Atoms | ZeroOcc | AltConf |
|-----|-------|----------|-------|---------|---------|
| 4   | W     | 84       | Total | O       | 0       |
|     |       |          | 84    | 84      |         |







## 4 Data and refinement statistics i

| Property                                                                | Value                                                       | Source           |
|-------------------------------------------------------------------------|-------------------------------------------------------------|------------------|
| Space group                                                             | P 1                                                         | Depositor        |
| Cell constants<br>a, b, c, $\alpha$ , $\beta$ , $\gamma$                | 73.80Å 77.80Å 101.69Å<br>89.86° 90.05° 68.58°               | Depositor        |
| Resolution (Å)                                                          | 39.43 - 2.30<br>39.43 - 2.30                                | Depositor<br>EDS |
| % Data completeness<br>(in resolution range)                            | 96.5 (39.43-2.30)<br>95.8 (39.43-2.30)                      | Depositor<br>EDS |
| $R_{merge}$                                                             | (Not available)                                             | Depositor        |
| $R_{sym}$                                                               | (Not available)                                             | Depositor        |
| $\langle I/\sigma(I) \rangle$ <sup>1</sup>                              | 1.38 (at 2.29Å)                                             | Xtrriage         |
| Refinement program                                                      | BUSTER 2.11.7                                               | Depositor        |
| R, $R_{free}$                                                           | 0.212 , 0.263<br>0.222 , 0.283                              | Depositor<br>DCC |
| $R_{free}$ test set                                                     | 4728 reflections (5.24%)                                    | wwPDB-VP         |
| Wilson B-factor (Å <sup>2</sup> )                                       | 38.5                                                        | Xtrriage         |
| Anisotropy                                                              | 0.321                                                       | Xtrriage         |
| Bulk solvent $k_{sol}$ (e/Å <sup>3</sup> ), $B_{sol}$ (Å <sup>2</sup> ) | 0.37 , 47.4                                                 | EDS              |
| L-test for twinning <sup>2</sup>                                        | $\langle  L  \rangle = 0.49$ , $\langle L^2 \rangle = 0.33$ | Xtrriage         |
| Estimated twinning fraction                                             | 0.448 for -h,-k,l                                           | Xtrriage         |
| $F_o, F_c$ correlation                                                  | 0.94                                                        | EDS              |
| Total number of atoms                                                   | 16055                                                       | wwPDB-VP         |
| Average B, all atoms (Å <sup>2</sup> )                                  | 50.0                                                        | wwPDB-VP         |

Xtrriage's analysis on translational NCS is as follows: *The analyses of the Patterson function reveals a significant off-origin peak that is 43.06 % of the origin peak, indicating pseudo-translational symmetry. The chance of finding a peak of this or larger height randomly in a structure without pseudo-translational symmetry is equal to 1.8623e-04. The detected translational NCS is most likely also responsible for the elevated intensity ratio.*

<sup>1</sup> Intensities estimated from amplitudes.

<sup>2</sup> Theoretical values of  $\langle |L| \rangle$ ,  $\langle L^2 \rangle$  for acentric reflections are 0.5, 0.333 respectively for untwinned datasets, and 0.375, 0.2 for perfectly twinned datasets.

## 5 Model quality [i](#)

### 5.1 Standard geometry [i](#)

Bond lengths and bond angles in the following residue types are not validated in this section: DMS, INH

The Z score for a bond length (or angle) is the number of standard deviations the observed value is removed from the expected value. A bond length (or angle) with  $|Z| > 5$  is considered an outlier worth inspection. RMSZ is the root-mean-square of all Z scores of the bond lengths (or angles).

| Mol | Chain | Bond lengths |         | Bond angles |         |
|-----|-------|--------------|---------|-------------|---------|
|     |       | RMSZ         | # Z  >5 | RMSZ        | # Z  >5 |
| 1   | A     | 0.50         | 0/1909  | 0.70        | 0/2598  |
| 1   | B     | 0.52         | 0/1979  | 0.68        | 0/2686  |
| 1   | C     | 0.49         | 0/1976  | 0.69        | 0/2686  |
| 1   | D     | 0.52         | 0/2041  | 0.69        | 0/2770  |
| 1   | E     | 0.51         | 0/1998  | 0.70        | 0/2709  |
| 1   | F     | 0.53         | 0/2035  | 0.73        | 0/2759  |
| 1   | G     | 0.51         | 0/2049  | 0.69        | 0/2779  |
| 1   | H     | 0.52         | 0/2071  | 0.70        | 0/2809  |
| All | All   | 0.51         | 0/16058 | 0.70        | 0/21796 |

There are no bond length outliers.

There are no bond angle outliers.

There are no chirality outliers.

There are no planarity outliers.

### 5.2 Too-close contacts [i](#)

In the following table, the Non-H and H(model) columns list the number of non-hydrogen atoms and hydrogen atoms in the chain respectively. The H(added) column lists the number of hydrogen atoms added and optimized by MolProbity. The Clashes column lists the number of clashes within the asymmetric unit, whereas Symm-Clashes lists symmetry related clashes.

| Mol | Chain | Non-H | H(model) | H(added) | Clashes | Symm-Clashes |
|-----|-------|-------|----------|----------|---------|--------------|
| 1   | A     | 1865  | 0        | 1732     | 17      | 0            |
| 1   | B     | 1934  | 0        | 1821     | 19      | 0            |
| 1   | C     | 1928  | 0        | 1816     | 16      | 0            |
| 1   | D     | 1993  | 0        | 1897     | 18      | 0            |
| 1   | E     | 1952  | 0        | 1873     | 28      | 0            |

*Continued on next page...*

Continued from previous page...

| Mol | Chain | Non-H | H(model) | H(added) | Clashes | Symm-Clashes |
|-----|-------|-------|----------|----------|---------|--------------|
| 1   | F     | 1990  | 0        | 1916     | 24      | 0            |
| 1   | G     | 2005  | 0        | 1920     | 22      | 0            |
| 1   | H     | 2024  | 0        | 1938     | 24      | 0            |
| 2   | I     | 272   | 0        | 44       | 20      | 0            |
| 3   | K     | 8     | 0        | 12       | 1       | 0            |
| 4   | W     | 84    | 0        | 0        | 2       | 0            |
| All | All   | 16055 | 0        | 14969    | 171     | 0            |

The all-atom clashscore is defined as the number of clashes found per 1000 atoms (including hydrogen atoms). The all-atom clashscore for this structure is 6.

All (171) close contacts within the same asymmetric unit are listed below, sorted by their clash magnitude.

| Atom-1           | Atom-2           | Interatomic distance (Å) | Clash overlap (Å) |
|------------------|------------------|--------------------------|-------------------|
| 1:F:636:GLU:HG2  | 1:F:868:GLY:HA2  | 1.59                     | 0.83              |
| 1:D:609:ASN:HD22 | 1:D:612:ASP:H    | 1.25                     | 0.83              |
| 1:G:866:ASP:HB2  | 1:G:870:ALA:HA   | 1.58                     | 0.83              |
| 1:G:609:ASN:HD22 | 1:G:612:ASP:H    | 1.28                     | 0.81              |
| 1:H:645:HIS:HD2  | 1:H:647:ASN:H    | 1.30                     | 0.80              |
| 1:B:853:ASN:ND2  | 1:B:867:PHE:H    | 1.82                     | 0.76              |
| 1:D:853:ASN:ND2  | 1:D:867:PHE:H    | 1.84                     | 0.76              |
| 1:F:855:PHE:CE2  | 2:I:4:INH:C14    | 2.70                     | 0.75              |
| 1:B:853:ASN:HD22 | 1:B:867:PHE:H    | 1.33                     | 0.74              |
| 1:E:920:TYR:HB3  | 1:E:924:VAL:HG21 | 1.70                     | 0.74              |
| 1:D:639:LEU:HD12 | 1:D:875:ALA:HB1  | 1.69                     | 0.73              |
| 1:C:609:ASN:HD22 | 1:C:612:ASP:H    | 1.36                     | 0.72              |
| 1:A:649:VAL:HG23 | 1:A:803:GLU:HG2  | 1.72                     | 0.72              |
| 1:H:609:ASN:HD22 | 1:H:612:ASP:H    | 1.37                     | 0.70              |
| 1:F:645:HIS:HD2  | 1:F:647:ASN:H    | 1.39                     | 0.70              |
| 1:B:609:ASN:HD22 | 1:B:612:ASP:H    | 1.39                     | 0.70              |
| 1:H:645:HIS:CD2  | 1:H:647:ASN:H    | 2.09                     | 0.70              |
| 1:B:604:VAL:HG23 | 1:B:869:LEU:HD21 | 1.75                     | 0.69              |
| 1:A:609:ASN:HD22 | 1:A:612:ASP:H    | 1.39                     | 0.68              |
| 1:F:609:ASN:HD22 | 1:F:612:ASP:H    | 1.39                     | 0.68              |
| 1:E:609:ASN:HD22 | 1:E:612:ASP:H    | 1.40                     | 0.67              |
| 1:D:645:HIS:HD2  | 1:D:647:ASN:H    | 1.41                     | 0.66              |
| 1:B:645:HIS:HD2  | 1:B:647:ASN:H    | 1.43                     | 0.66              |
| 1:D:795:VAL:HG11 | 1:F:1005:GLN:HB3 | 1.77                     | 0.66              |
| 1:D:853:ASN:HD22 | 1:D:867:PHE:H    | 1.42                     | 0.66              |
| 1:H:960:PRO:HG2  | 1:H:979:SER:HA   | 1.79                     | 0.65              |
| 1:E:649:VAL:HG23 | 1:E:803:GLU:HG2  | 1.79                     | 0.65              |

Continued on next page...

*Continued from previous page...*

| Atom-1           | Atom-2           | Interatomic distance (Å) | Clash overlap (Å) |
|------------------|------------------|--------------------------|-------------------|
| 1:B:645:HIS:CD2  | 1:B:647:ASN:H    | 2.15                     | 0.64              |
| 1:D:609:ASN:ND2  | 1:D:612:ASP:H    | 1.95                     | 0.64              |
| 1:F:645:HIS:CD2  | 1:F:647:ASN:H    | 2.16                     | 0.64              |
| 1:D:645:HIS:CD2  | 1:D:647:ASN:H    | 2.16                     | 0.63              |
| 1:F:855:PHE:CZ   | 2:I:4:INH:C13    | 2.82                     | 0.63              |
| 1:E:609:ASN:HB3  | 1:E:612:ASP:OD1  | 1.99                     | 0.63              |
| 1:G:859:ASP:HB3  | 1:G:861:HIS:HD2  | 1.64                     | 0.63              |
| 1:G:867:PHE:HA   | 2:I:3:INH:H48    | 1.80                     | 0.62              |
| 1:H:619:LYS:HE2  | 1:H:621:ILE:HD11 | 1.81                     | 0.62              |
| 1:G:609:ASN:ND2  | 1:G:612:ASP:H    | 1.96                     | 0.61              |
| 1:E:593:LEU:HD11 | 1:E:608:GLN:HB2  | 1.83                     | 0.61              |
| 1:D:604:VAL:HG23 | 1:D:869:LEU:HD21 | 1.83                     | 0.61              |
| 1:C:816:GLN:HB3  | 1:H:806:GLU:HG2  | 1.82                     | 0.60              |
| 1:F:648:ILE:HG22 | 1:F:866:ASP:OD2  | 2.01                     | 0.60              |
| 1:A:645:HIS:HD2  | 1:A:647:ASN:H    | 1.49                     | 0.60              |
| 1:G:609:ASN:HB3  | 1:G:612:ASP:OD1  | 2.01                     | 0.60              |
| 1:F:855:PHE:CE2  | 2:I:4:INH:C15    | 2.85                     | 0.59              |
| 1:E:645:HIS:HB3  | 1:E:648:ILE:HG12 | 1.85                     | 0.59              |
| 1:G:650:ARG:HG2  | 1:G:652:TYR:CE1  | 2.38                     | 0.59              |
| 1:C:645:HIS:HD2  | 1:C:647:ASN:H    | 1.49                     | 0.59              |
| 1:B:909:SER:HB2  | 1:B:924:VAL:HG13 | 1.85                     | 0.58              |
| 1:E:609:ASN:ND2  | 1:E:612:ASP:H    | 2.02                     | 0.58              |
| 1:F:960:PRO:HG2  | 1:F:979:SER:HA   | 1.86                     | 0.57              |
| 1:C:931:ILE:HG12 | 1:C:982:LEU:HD21 | 1.86                     | 0.57              |
| 1:G:645:HIS:HD2  | 1:G:647:ASN:H    | 1.53                     | 0.56              |
| 1:C:629:GLN:O    | 1:C:633:ILE:HG12 | 2.05                     | 0.56              |
| 1:D:650:ARG:HG2  | 1:D:652:TYR:CE1  | 2.41                     | 0.56              |
| 1:D:909:SER:HB2  | 1:D:924:VAL:HG13 | 1.87                     | 0.56              |
| 1:H:855:PHE:CE1  | 2:I:2:INH:C14    | 2.89                     | 0.55              |
| 1:C:645:HIS:CD2  | 1:C:647:ASN:H    | 2.24                     | 0.55              |
| 1:G:645:HIS:CD2  | 1:G:647:ASN:H    | 2.24                     | 0.55              |
| 1:B:845:ILE:HD11 | 1:B:922:GLN:HG2  | 1.88                     | 0.55              |
| 1:H:648:ILE:HG23 | 1:H:866:ASP:OD2  | 2.06                     | 0.55              |
| 1:D:583:PHE:N    | 1:D:588:ILE:HD11 | 2.22                     | 0.55              |
| 1:B:645:HIS:HB3  | 1:B:648:ILE:HG12 | 1.88                     | 0.54              |
| 1:F:855:PHE:CZ   | 2:I:4:INH:C14    | 2.90                     | 0.54              |
| 1:G:944:ALA:O    | 1:G:948:ILE:HG12 | 2.09                     | 0.53              |
| 1:F:944:ALA:O    | 1:F:948:ILE:HG12 | 2.10                     | 0.52              |
| 1:G:920:TYR:HB3  | 1:G:924:VAL:HG21 | 1.90                     | 0.52              |
| 1:C:649:VAL:HG12 | 1:C:864:ILE:O    | 2.09                     | 0.52              |
| 1:B:816:GLN:HG3  | 1:E:806:GLU:HG3  | 1.92                     | 0.52              |

*Continued on next page...*



*Continued from previous page...*

| Atom-1           | Atom-2           | Interatomic distance (Å) | Clash overlap (Å) |
|------------------|------------------|--------------------------|-------------------|
| 1:E:591:GLU:HG3  | 1:E:610:LYS:HE2  | 1.92                     | 0.52              |
| 1:B:619:LYS:HE2  | 1:B:621:ILE:HD11 | 1.91                     | 0.51              |
| 2:I:5:INH:C4     | 2:I:5:INH:N2     | 2.73                     | 0.51              |
| 1:H:593:LEU:HD11 | 1:H:608:GLN:HB2  | 1.92                     | 0.51              |
| 1:E:845:ILE:HD13 | 1:E:847:ARG:HG3  | 1.92                     | 0.51              |
| 1:G:853:ASN:ND2  | 1:G:866:ASP:O    | 2.43                     | 0.51              |
| 1:E:844:MET:HA   | 1:E:914:GLY:HA3  | 1.93                     | 0.50              |
| 2:I:4:INH:C4     | 2:I:4:INH:N2     | 2.75                     | 0.50              |
| 1:C:853:ASN:ND2  | 1:C:867:PHE:H    | 2.09                     | 0.49              |
| 1:C:826:TRP:CZ2  | 1:C:974:GLN:HG3  | 2.47                     | 0.49              |
| 1:B:824:ARG:HD2  | 1:E:807:LYS:HD3  | 1.93                     | 0.49              |
| 1:E:650:ARG:HG2  | 1:E:652:TYR:CE1  | 2.47                     | 0.49              |
| 2:I:3:INH:C4     | 2:I:3:INH:N2     | 2.75                     | 0.49              |
| 2:I:8:INH:N2     | 2:I:8:INH:C4     | 2.76                     | 0.49              |
| 1:D:920:TYR:C    | 1:D:922:GLN:H    | 2.16                     | 0.49              |
| 1:H:855:PHE:CZ   | 2:I:2:INH:C13    | 2.96                     | 0.49              |
| 1:H:650:ARG:HG2  | 1:H:652:TYR:CE1  | 2.48                     | 0.49              |
| 1:H:903:GLY:HA2  | 1:H:906:LEU:HD12 | 1.95                     | 0.48              |
| 1:H:855:PHE:CE1  | 2:I:2:INH:C15    | 2.96                     | 0.48              |
| 1:A:828:LEU:HD22 | 1:A:862:VAL:HG23 | 1.96                     | 0.48              |
| 1:C:609:ASN:ND2  | 1:C:612:ASP:H    | 2.10                     | 0.48              |
| 1:A:584:SER:O    | 1:A:588:ILE:HG12 | 2.13                     | 0.48              |
| 1:H:831:GLU:HB3  | 1:H:862:VAL:HB   | 1.94                     | 0.48              |
| 1:A:645:HIS:CD2  | 1:A:647:ASN:H    | 2.29                     | 0.48              |
| 1:E:980:TRP:CZ2  | 1:E:990:PRO:HB3  | 2.48                     | 0.48              |
| 1:G:602:GLY:HA3  | 1:G:621:ILE:HD13 | 1.96                     | 0.48              |
| 1:H:898:LEU:O    | 1:H:903:GLY:HA3  | 2.14                     | 0.48              |
| 1:F:650:ARG:HD2  | 4:W:4:HOH:O      | 2.14                     | 0.48              |
| 1:G:866:ASP:O    | 1:G:867:PHE:CB   | 2.61                     | 0.47              |
| 1:H:609:ASN:ND2  | 1:H:612:ASP:H    | 2.08                     | 0.47              |
| 1:E:645:HIS:CD2  | 1:E:647:ASN:H    | 2.31                     | 0.47              |
| 1:E:853:ASN:ND2  | 1:E:867:PHE:H    | 2.12                     | 0.47              |
| 1:A:813:THR:HG22 | 1:A:818:LEU:HB2  | 1.96                     | 0.47              |
| 1:E:645:HIS:HD2  | 1:E:647:ASN:H    | 1.61                     | 0.47              |
| 2:I:6:INH:C4     | 2:I:6:INH:N2     | 2.75                     | 0.47              |
| 1:C:650:ARG:HG2  | 1:C:652:TYR:CE1  | 2.50                     | 0.47              |
| 1:E:931:ILE:HG23 | 1:E:951:LEU:HD22 | 1.97                     | 0.47              |
| 1:B:649:VAL:HG13 | 1:B:803:GLU:HG2  | 1.97                     | 0.47              |
| 1:D:639:LEU:CD1  | 1:D:875:ALA:HB1  | 2.40                     | 0.47              |
| 1:F:825:LEU:CD2  | 1:F:936:MET:HB3  | 2.45                     | 0.47              |
| 1:D:650:ARG:HD2  | 4:W:8:HOH:O      | 2.15                     | 0.46              |

*Continued on next page...*

Continued from previous page...

| Atom-1           | Atom-2            | Interatomic distance (Å) | Clash overlap (Å) |
|------------------|-------------------|--------------------------|-------------------|
| 1:A:943:THR:HG22 | 1:A:946:GLU:H     | 1.80                     | 0.46              |
| 1:B:980:TRP:CD1  | 1:B:990:PRO:HD3   | 2.50                     | 0.46              |
| 1:F:650:ARG:HG2  | 1:F:652:TYR:CE1   | 2.50                     | 0.46              |
| 1:H:833:LEU:HD11 | 1:H:995:LEU:HG    | 1.97                     | 0.46              |
| 2:I:2:INH:C4     | 2:I:2:INH:N2      | 2.78                     | 0.46              |
| 1:A:612:ASP:OD1  | 1:A:614:CYS:HB2   | 2.15                     | 0.46              |
| 1:F:845:ILE:HG12 | 1:F:871:THR:CG2   | 2.46                     | 0.46              |
| 1:A:629:GLN:O    | 1:A:633:ILE:HG12  | 2.16                     | 0.46              |
| 1:G:649:VAL:HG12 | 1:G:864:ILE:O     | 2.16                     | 0.46              |
| 1:E:866:ASP:O    | 2:I:5:INH:C17     | 2.64                     | 0.46              |
| 1:D:980:TRP:CD1  | 1:D:990:PRO:HD3   | 2.51                     | 0.46              |
| 1:E:826:TRP:CZ2  | 1:E:974:GLN:HG3   | 2.51                     | 0.46              |
| 1:G:950:VAL:HG13 | 1:G:963:PRO:HG3   | 1.98                     | 0.46              |
| 1:C:944:ALA:O    | 1:C:948:ILE:HG12  | 2.16                     | 0.46              |
| 1:H:836:LEU:HD11 | 1:H:925:ASP:HB3   | 1.98                     | 0.45              |
| 1:A:654:ALA:HA   | 1:A:799:TYR:O     | 2.17                     | 0.45              |
| 1:H:944:ALA:O    | 1:H:948:ILE:HG12  | 2.16                     | 0.45              |
| 1:G:906:LEU:HD13 | 1:G:951:LEU:HD12  | 1.98                     | 0.45              |
| 1:B:950:VAL:HG13 | 1:B:963:PRO:HG3   | 1.97                     | 0.45              |
| 1:F:833:LEU:HD11 | 1:F:995:LEU:HG    | 1.98                     | 0.45              |
| 1:E:648:ILE:HD12 | 1:E:839:ILE:HD11  | 1.98                     | 0.45              |
| 1:F:828:LEU:HD22 | 1:F:856:LEU:HD21  | 1.98                     | 0.44              |
| 1:H:855:PHE:CZ   | 2:I:2:INH:C14     | 3.00                     | 0.44              |
| 1:B:650:ARG:HG2  | 1:B:652:TYR:CE1   | 2.52                     | 0.44              |
| 1:A:948:ILE:O    | 1:A:952:ASN:HB2   | 2.18                     | 0.44              |
| 1:F:902:VAL:HG12 | 1:F:948:ILE:HD12  | 1.99                     | 0.44              |
| 2:I:1:INH:C4     | 2:I:1:INH:N2      | 2.79                     | 0.44              |
| 2:I:7:INH:C4     | 2:I:7:INH:N2      | 2.79                     | 0.44              |
| 1:H:852:VAL:HG22 | 3:K:1:DMS:H21     | 2.00                     | 0.44              |
| 1:C:595:LEU:HD21 | 1:C:598:LYS:HB2   | 2.00                     | 0.44              |
| 1:F:976:SER:O    | 1:F:980:TRP:HB2   | 2.18                     | 0.44              |
| 1:A:650:ARG:HG2  | 1:A:652:TYR:CE1   | 2.53                     | 0.43              |
| 1:B:609:ASN:ND2  | 1:B:612:ASP:H     | 2.13                     | 0.43              |
| 1:D:985:ASP:HB2  | 1:G:876:PHE:O     | 2.18                     | 0.43              |
| 1:E:829:PHE:HE2  | 1:E:1001:LEU:HD11 | 1.83                     | 0.43              |
| 1:F:903:GLY:HA2  | 1:F:906:LEU:HD12  | 2.01                     | 0.42              |
| 1:H:812:ASP:OD1  | 2:I:2:INH:N5      | 2.52                     | 0.42              |
| 1:B:583:PHE:HB3  | 1:B:588:ILE:HD11  | 2.01                     | 0.42              |
| 1:D:654:ALA:HA   | 1:D:799:TYR:O     | 2.18                     | 0.42              |
| 1:E:639:LEU:HD21 | 1:E:915:SER:HB2   | 2.00                     | 0.42              |
| 1:F:845:ILE:HG12 | 1:F:871:THR:HG21  | 2.02                     | 0.42              |

Continued on next page...

Continued from previous page...

| Atom-1           | Atom-2           | Interatomic distance (Å) | Clash overlap (Å) |
|------------------|------------------|--------------------------|-------------------|
| 1:C:980:TRP:CZ2  | 1:C:990:PRO:HB3  | 2.54                     | 0.42              |
| 1:G:645:HIS:HB3  | 1:G:648:ILE:HG12 | 2.02                     | 0.42              |
| 1:E:973:LYS:O    | 1:E:977:VAL:HG23 | 2.19                     | 0.42              |
| 1:F:847:ARG:HD3  | 1:F:869:LEU:CB   | 2.50                     | 0.42              |
| 1:C:654:ALA:HA   | 1:C:799:TYR:O    | 2.20                     | 0.42              |
| 1:C:645:HIS:HB3  | 1:C:648:ILE:HG12 | 2.02                     | 0.42              |
| 1:B:931:ILE:HG23 | 1:B:951:LEU:HD22 | 2.02                     | 0.41              |
| 1:E:819:TYR:CD1  | 1:E:939:HIS:HA   | 2.55                     | 0.41              |
| 1:H:833:LEU:HD21 | 1:H:995:LEU:HD23 | 2.02                     | 0.41              |
| 1:A:985:ASP:HA   | 1:A:986:PRO:HD2  | 1.76                     | 0.41              |
| 1:E:614:CYS:HB3  | 1:E:616:TYR:CE2  | 2.56                     | 0.41              |
| 1:A:649:VAL:HG12 | 1:A:864:ILE:O    | 2.20                     | 0.41              |
| 1:A:991:THR:OG1  | 1:A:994:GLU:HB2  | 2.21                     | 0.41              |
| 1:E:859:ASP:HB3  | 1:E:861:HIS:HD2  | 1.85                     | 0.41              |
| 1:G:846:HIS:O    | 1:G:847:ARG:HB2  | 2.20                     | 0.40              |
| 1:G:867:PHE:HA   | 2:I:3:INH:C13    | 2.47                     | 0.40              |
| 1:G:991:THR:OG1  | 1:G:994:GLU:HB2  | 2.21                     | 0.40              |
| 1:H:825:LEU:HD23 | 1:H:936:MET:HB3  | 2.03                     | 0.40              |
| 1:A:980:TRP:CZ2  | 1:A:990:PRO:HB3  | 2.57                     | 0.40              |
| 1:E:856:LEU:HD23 | 1:E:856:LEU:HA   | 1.91                     | 0.40              |
| 1:F:899:ALA:CB   | 1:F:948:ILE:HD11 | 2.51                     | 0.40              |

There are no symmetry-related clashes.

## 5.3 Torsion angles [\(i\)](#)

### 5.3.1 Protein backbone [\(i\)](#)

In the following table, the Percentiles column shows the percent Ramachandran outliers of the chain as a percentile score with respect to all X-ray entries followed by that with respect to entries of similar resolution.

The Analysed column shows the number of residues for which the backbone conformation was analysed, and the total number of residues.

| Mol | Chain | Analysed      | Favoured  | Allowed | Outliers | Percentiles |
|-----|-------|---------------|-----------|---------|----------|-------------|
| 1   | A     | 237/320 (74%) | 221 (93%) | 14 (6%) | 2 (1%)   | 21 25       |
| 1   | B     | 241/320 (75%) | 230 (95%) | 11 (5%) | 0        | 100 100     |
| 1   | C     | 241/320 (75%) | 227 (94%) | 14 (6%) | 0        | 100 100     |
| 1   | D     | 246/320 (77%) | 234 (95%) | 10 (4%) | 2 (1%)   | 21 25       |

Continued on next page...

Continued from previous page...

| Mol | Chain | Analysed        | Favoured   | Allowed | Outliers | Percentiles |     |
|-----|-------|-----------------|------------|---------|----------|-------------|-----|
| 1   | E     | 239/320 (75%)   | 229 (96%)  | 8 (3%)  | 2 (1%)   | 21          | 25  |
| 1   | F     | 244/320 (76%)   | 228 (93%)  | 13 (5%) | 3 (1%)   | 14          | 15  |
| 1   | G     | 245/320 (77%)   | 227 (93%)  | 17 (7%) | 1 (0%)   | 36          | 45  |
| 1   | H     | 247/320 (77%)   | 237 (96%)  | 10 (4%) | 0        | 100         | 100 |
| All | All   | 1940/2560 (76%) | 1833 (94%) | 97 (5%) | 10 (0%)  | 31          | 38  |

All (10) Ramachandran outliers are listed below:

| Mol | Chain | Res | Type |
|-----|-------|-----|------|
| 1   | A     | 848 | ASP  |
| 1   | D     | 848 | ASP  |
| 1   | E     | 917 | LYS  |
| 1   | F     | 902 | VAL  |
| 1   | F     | 970 | GLU  |
| 1   | A     | 867 | PHE  |
| 1   | D     | 873 | HIS  |
| 1   | E     | 919 | ALA  |
| 1   | G     | 942 | VAL  |
| 1   | F     | 869 | LEU  |

### 5.3.2 Protein sidechains [i](#)

In the following table, the Percentiles column shows the percent sidechain outliers of the chain as a percentile score with respect to all X-ray entries followed by that with respect to entries of similar resolution.

The Analysed column shows the number of residues for which the sidechain conformation was analysed, and the total number of residues.

| Mol | Chain | Analysed      | Rotameric | Outliers | Percentiles |    |
|-----|-------|---------------|-----------|----------|-------------|----|
| 1   | A     | 184/284 (65%) | 173 (94%) | 11 (6%)  | 21          | 28 |
| 1   | B     | 194/284 (68%) | 181 (93%) | 13 (7%)  | 18          | 23 |
| 1   | C     | 194/284 (68%) | 176 (91%) | 18 (9%)  | 10          | 11 |
| 1   | D     | 204/284 (72%) | 190 (93%) | 14 (7%)  | 17          | 22 |
| 1   | E     | 200/284 (70%) | 183 (92%) | 17 (8%)  | 12          | 14 |
| 1   | F     | 205/284 (72%) | 188 (92%) | 17 (8%)  | 12          | 15 |
| 1   | G     | 206/284 (72%) | 188 (91%) | 18 (9%)  | 11          | 13 |
| 1   | H     | 210/284 (74%) | 197 (94%) | 13 (6%)  | 20          | 27 |

Continued on next page...

Continued from previous page...

| Mol | Chain | Analysed        | Rotameric  | Outliers | Percentiles |    |
|-----|-------|-----------------|------------|----------|-------------|----|
| All | All   | 1597/2272 (70%) | 1476 (92%) | 121 (8%) | 14          | 18 |

All (121) residues with a non-rotameric sidechain are listed below:

| Mol | Chain | Res | Type |
|-----|-------|-----|------|
| 1   | A     | 585 | ARG  |
| 1   | A     | 601 | PHE  |
| 1   | A     | 642 | ARG  |
| 1   | A     | 650 | ARG  |
| 1   | A     | 653 | ASN  |
| 1   | A     | 867 | PHE  |
| 1   | A     | 916 | THR  |
| 1   | A     | 943 | THR  |
| 1   | A     | 952 | ASN  |
| 1   | A     | 959 | SER  |
| 1   | A     | 984 | HIS  |
| 1   | B     | 598 | LYS  |
| 1   | B     | 623 | ILE  |
| 1   | B     | 653 | ASN  |
| 1   | B     | 795 | VAL  |
| 1   | B     | 807 | LYS  |
| 1   | B     | 836 | LEU  |
| 1   | B     | 845 | ILE  |
| 1   | B     | 867 | PHE  |
| 1   | B     | 873 | HIS  |
| 1   | B     | 909 | SER  |
| 1   | B     | 926 | LEU  |
| 1   | B     | 943 | THR  |
| 1   | B     | 984 | HIS  |
| 1   | C     | 584 | SER  |
| 1   | C     | 598 | LYS  |
| 1   | C     | 642 | ARG  |
| 1   | C     | 653 | ASN  |
| 1   | C     | 795 | VAL  |
| 1   | C     | 806 | GLU  |
| 1   | C     | 813 | THR  |
| 1   | C     | 825 | LEU  |
| 1   | C     | 862 | VAL  |
| 1   | C     | 867 | PHE  |
| 1   | C     | 912 | VAL  |
| 1   | C     | 922 | GLN  |
| 1   | C     | 926 | LEU  |

Continued on next page...

*Continued from previous page...*

| Mol | Chain | Res  | Type |
|-----|-------|------|------|
| 1   | C     | 943  | THR  |
| 1   | C     | 952  | ASN  |
| 1   | C     | 984  | HIS  |
| 1   | C     | 993  | THR  |
| 1   | C     | 1001 | LEU  |
| 1   | D     | 598  | LYS  |
| 1   | D     | 649  | VAL  |
| 1   | D     | 653  | ASN  |
| 1   | D     | 795  | VAL  |
| 1   | D     | 836  | LEU  |
| 1   | D     | 845  | ILE  |
| 1   | D     | 852  | VAL  |
| 1   | D     | 867  | PHE  |
| 1   | D     | 909  | SER  |
| 1   | D     | 926  | LEU  |
| 1   | D     | 943  | THR  |
| 1   | D     | 984  | HIS  |
| 1   | D     | 999  | GLU  |
| 1   | D     | 1001 | LEU  |
| 1   | E     | 588  | ILE  |
| 1   | E     | 605  | ILE  |
| 1   | E     | 608  | GLN  |
| 1   | E     | 620  | ARG  |
| 1   | E     | 623  | ILE  |
| 1   | E     | 633  | ILE  |
| 1   | E     | 642  | ARG  |
| 1   | E     | 653  | ASN  |
| 1   | E     | 806  | GLU  |
| 1   | E     | 830  | ARG  |
| 1   | E     | 867  | PHE  |
| 1   | E     | 909  | SER  |
| 1   | E     | 921  | ASN  |
| 1   | E     | 947  | ARG  |
| 1   | E     | 953  | GLN  |
| 1   | E     | 983  | ASN  |
| 1   | E     | 998  | SER  |
| 1   | F     | 585  | ARG  |
| 1   | F     | 623  | ILE  |
| 1   | F     | 642  | ARG  |
| 1   | F     | 653  | ASN  |
| 1   | F     | 795  | VAL  |
| 1   | F     | 807  | LYS  |

*Continued on next page...*

*Continued from previous page...*

| Mol | Chain | Res  | Type |
|-----|-------|------|------|
| 1   | F     | 825  | LEU  |
| 1   | F     | 842  | LYS  |
| 1   | F     | 845  | ILE  |
| 1   | F     | 850  | LYS  |
| 1   | F     | 867  | PHE  |
| 1   | F     | 871  | THR  |
| 1   | F     | 909  | SER  |
| 1   | F     | 921  | ASN  |
| 1   | F     | 926  | LEU  |
| 1   | F     | 980  | TRP  |
| 1   | F     | 998  | SER  |
| 1   | G     | 585  | ARG  |
| 1   | G     | 598  | LYS  |
| 1   | G     | 620  | ARG  |
| 1   | G     | 636  | GLU  |
| 1   | G     | 642  | ARG  |
| 1   | G     | 813  | THR  |
| 1   | G     | 825  | LEU  |
| 1   | G     | 859  | ASP  |
| 1   | G     | 867  | PHE  |
| 1   | G     | 874  | LEU  |
| 1   | G     | 909  | SER  |
| 1   | G     | 926  | LEU  |
| 1   | G     | 942  | VAL  |
| 1   | G     | 947  | ARG  |
| 1   | G     | 965  | ASP  |
| 1   | G     | 976  | SER  |
| 1   | G     | 984  | HIS  |
| 1   | G     | 1007 | GLU  |
| 1   | H     | 585  | ARG  |
| 1   | H     | 642  | ARG  |
| 1   | H     | 648  | ILE  |
| 1   | H     | 653  | ASN  |
| 1   | H     | 807  | LYS  |
| 1   | H     | 813  | THR  |
| 1   | H     | 825  | LEU  |
| 1   | H     | 869  | LEU  |
| 1   | H     | 909  | SER  |
| 1   | H     | 921  | ASN  |
| 1   | H     | 928  | SER  |
| 1   | H     | 999  | GLU  |
| 1   | H     | 1003 | PRO  |

Some sidechains can be flipped to improve hydrogen bonding and reduce clashes. All (32) such sidechains are listed below:

| Mol | Chain | Res | Type |
|-----|-------|-----|------|
| 1   | A     | 609 | ASN  |
| 1   | A     | 645 | HIS  |
| 1   | A     | 853 | ASN  |
| 1   | A     | 984 | HIS  |
| 1   | B     | 609 | ASN  |
| 1   | B     | 624 | ASN  |
| 1   | B     | 645 | HIS  |
| 1   | B     | 853 | ASN  |
| 1   | C     | 609 | ASN  |
| 1   | C     | 645 | HIS  |
| 1   | C     | 853 | ASN  |
| 1   | D     | 609 | ASN  |
| 1   | D     | 645 | HIS  |
| 1   | D     | 853 | ASN  |
| 1   | E     | 609 | ASN  |
| 1   | E     | 645 | HIS  |
| 1   | E     | 853 | ASN  |
| 1   | E     | 861 | HIS  |
| 1   | E     | 913 | GLN  |
| 1   | E     | 921 | ASN  |
| 1   | F     | 609 | ASN  |
| 1   | F     | 645 | HIS  |
| 1   | F     | 853 | ASN  |
| 1   | G     | 609 | ASN  |
| 1   | G     | 645 | HIS  |
| 1   | G     | 853 | ASN  |
| 1   | G     | 861 | HIS  |
| 1   | H     | 609 | ASN  |
| 1   | H     | 645 | HIS  |
| 1   | H     | 853 | ASN  |
| 1   | H     | 921 | ASN  |
| 1   | H     | 974 | GLN  |

### 5.3.3 RNA [i](#)

There are no RNA molecules in this entry.

### 5.4 Non-standard residues in protein, DNA, RNA chains [i](#)

There are no non-standard protein/DNA/RNA residues in this entry.



## 5.5 Carbohydrates [i](#)

There are no carbohydrates in this entry.

## 5.6 Ligand geometry [i](#)

Of 10 ligands modelled in this entry, 8 could not be matched to an existing wwPDB Chemical Component Dictionary definition at this stage - leaving 2 for Mogul analysis.

In the following table, the Counts columns list the number of bonds (or angles) for which Mogul statistics could be retrieved, the number of bonds (or angles) that are observed in the model and the number of bonds (or angles) that are defined in the Chemical Component Dictionary. The Link column lists molecule types, if any, to which the group is linked. The Z score for a bond length (or angle) is the number of standard deviations the observed value is removed from the expected value. A bond length (or angle) with  $|Z| > 2$  is considered an outlier worth inspection. RMSZ is the root-mean-square of all Z scores of the bond lengths (or angles).

| Mol | Type | Chain | Res | Link | Bond lengths |      |          | Bond angles |      |          |
|-----|------|-------|-----|------|--------------|------|----------|-------------|------|----------|
|     |      |       |     |      | Counts       | RMSZ | # Z  > 2 | Counts      | RMSZ | # Z  > 2 |
| 3   | DMS  | K     | 1   | -    | 3,3,3        | 0.38 | 0        | 3,3,3       | 0.38 | 0        |
| 3   | DMS  | K     | 2   | -    | 3,3,3        | 0.35 | 0        | 3,3,3       | 0.78 | 0        |

In the following table, the Chirals column lists the number of chiral outliers, the number of chiral centers analysed, the number of these observed in the model and the number defined in the Chemical Component Dictionary. Similar counts are reported in the Torsion and Rings columns. '-' means no outliers of that kind were identified.

| Mol | Type | Chain | Res | Link | Chirals | Torsions | Rings   |
|-----|------|-------|-----|------|---------|----------|---------|
| 3   | DMS  | K     | 1   | -    | -       | 0/0/0/0  | 0/0/0/0 |
| 3   | DMS  | K     | 2   | -    | -       | 0/0/0/0  | 0/0/0/0 |

There are no bond length outliers.

There are no bond angle outliers.

There are no chirality outliers.

There are no torsion outliers.

There are no ring outliers.

1 monomer is involved in 1 short contact:

| Mol | Chain | Res | Type | Clashes | Symm-Clashes |
|-----|-------|-----|------|---------|--------------|
| 3   | K     | 1   | DMS  | 1       | 0            |

## 5.7 Other polymers [i](#)

There are no such residues in this entry.

## 5.8 Polymer linkage issues [i](#)

There are no chain breaks in this entry.

PRELIMINARY VALIDATION REPORT

## 6 Fit of model and data i

### 6.1 Protein, DNA and RNA chains i

In the following table, the column labelled '#RSRZ > 2' contains the number (and percentage) of RSRZ outliers, followed by percent RSRZ outliers for the chain as percentile scores relative to all X-ray entries and entries of similar resolution. The OWAB column contains the minimum, median, 95<sup>th</sup> percentile and maximum values of the occupancy-weighted average B-factor per residue. The column labelled 'Q < 0.9' lists the number of (and percentage) of residues with an average occupancy less than 0.9.

| Mol | Chain | Analysed        | <RSRZ> | #RSRZ > 2     | OWAB(Å <sup>2</sup> ) | Q < 0.9 |
|-----|-------|-----------------|--------|---------------|-----------------------|---------|
| 1   | A     | 245/320 (76%)   | -0.01  | 6 (2%) 59 66  | 23, 50, 89, 102       | 0       |
| 1   | B     | 249/320 (77%)   | -0.08  | 8 (3%) 47 55  | 23, 45, 76, 97        | 0       |
| 1   | C     | 249/320 (77%)   | 0.11   | 11 (4%) 34 41 | 24, 51, 96, 111       | 0       |
| 1   | D     | 254/320 (79%)   | -0.02  | 6 (2%) 59 66  | 23, 46, 80, 99        | 0       |
| 1   | E     | 249/320 (77%)   | 0.07   | 12 (4%) 30 38 | 28, 51, 83, 102       | 0       |
| 1   | F     | 254/320 (79%)   | -0.09  | 3 (1%) 79 83  | 23, 46, 76, 100       | 0       |
| 1   | G     | 257/320 (80%)   | 0.07   | 11 (4%) 35 42 | 29, 52, 84, 100       | 0       |
| 1   | H     | 259/320 (80%)   | -0.15  | 1 (0%) 92 95  | 23, 46, 74, 110       | 0       |
| All | All   | 2016/2560 (78%) | -0.01  | 58 (2%) 51 59 | 23, 49, 84, 111       | 0       |

All (58) RSRZ outliers are listed below:

| Mol | Chain | Res | Type | RSRZ |
|-----|-------|-----|------|------|
| 1   | E     | 584 | SER  | 7.4  |
| 1   | B     | 966 | PHE  | 6.3  |
| 1   | G     | 982 | LEU  | 5.0  |
| 1   | G     | 584 | SER  | 4.8  |
| 1   | F     | 795 | VAL  | 4.4  |
| 1   | B     | 968 | ASP  | 4.3  |
| 1   | C     | 968 | ASP  | 4.3  |
| 1   | G     | 626 | ALA  | 3.8  |
| 1   | C     | 626 | ALA  | 3.7  |
| 1   | E     | 625 | PRO  | 3.7  |
| 1   | G     | 963 | PRO  | 3.6  |
| 1   | D     | 968 | ASP  | 3.5  |
| 1   | G     | 984 | HIS  | 3.4  |
| 1   | C     | 960 | PRO  | 3.3  |
| 1   | F     | 968 | ASP  | 3.3  |
| 1   | A     | 626 | ALA  | 3.2  |

*Continued on next page...*

Continued from previous page...

| Mol | Chain | Res  | Type | RSRZ |
|-----|-------|------|------|------|
| 1   | C     | 970  | GLU  | 3.2  |
| 1   | E     | 984  | HIS  | 3.2  |
| 1   | F     | 969  | GLY  | 3.1  |
| 1   | E     | 626  | ALA  | 3.1  |
| 1   | C     | 942  | VAL  | 3.1  |
| 1   | D     | 966  | PHE  | 3.0  |
| 1   | C     | 1000 | LEU  | 3.0  |
| 1   | D     | 965  | ASP  | 3.0  |
| 1   | E     | 601  | PHE  | 2.9  |
| 1   | E     | 982  | LEU  | 2.9  |
| 1   | A     | 942  | VAL  | 2.9  |
| 1   | B     | 942  | VAL  | 2.9  |
| 1   | C     | 949  | PHE  | 2.9  |
| 1   | E     | 915  | SER  | 2.8  |
| 1   | E     | 630  | PHE  | 2.8  |
| 1   | G     | 601  | PHE  | 2.8  |
| 1   | G     | 949  | PHE  | 2.8  |
| 1   | B     | 969  | GLY  | 2.7  |
| 1   | E     | 992  | ALA  | 2.6  |
| 1   | H     | 600  | ALA  | 2.5  |
| 1   | A     | 845  | ILE  | 2.5  |
| 1   | G     | 969  | GLY  | 2.5  |
| 1   | G     | 942  | VAL  | 2.5  |
| 1   | D     | 909  | SER  | 2.5  |
| 1   | B     | 970  | GLU  | 2.4  |
| 1   | D     | 948  | ILE  | 2.4  |
| 1   | E     | 948  | ILE  | 2.4  |
| 1   | C     | 909  | SER  | 2.3  |
| 1   | C     | 951  | LEU  | 2.3  |
| 1   | A     | 600  | ALA  | 2.3  |
| 1   | B     | 847  | ARG  | 2.3  |
| 1   | E     | 797  | TYR  | 2.2  |
| 1   | C     | 965  | ASP  | 2.2  |
| 1   | C     | 845  | ILE  | 2.2  |
| 1   | E     | 588  | ILE  | 2.2  |
| 1   | D     | 949  | PHE  | 2.1  |
| 1   | B     | 941  | MET  | 2.1  |
| 1   | A     | 958  | THR  | 2.1  |
| 1   | G     | 633  | ILE  | 2.1  |
| 1   | G     | 659  | HIS  | 2.0  |
| 1   | A     | 968  | ASP  | 2.0  |
| 1   | B     | 626  | ALA  | 2.0  |

## 6.2 Non-standard residues in protein, DNA, RNA chains [i](#)

There are no non-standard protein/DNA/RNA residues in this entry.

## 6.3 Carbohydrates [i](#)

There are no carbohydrates in this entry.

## 6.4 Ligands [i](#)

In the following table, the Atoms column lists the number of modelled atoms in the group and the number defined in the chemical component dictionary. The B-factors column lists the minimum, median, 95<sup>th</sup> percentile and maximum values of B factors of atoms in the group. The column labelled 'Q<0.9' lists the number of atoms with occupancy less than 0.9.

| Mol | Type | Chain | Res | Atoms | RSCC | RSR  | B-factors(Å <sup>2</sup> ) | Q<0.9 |
|-----|------|-------|-----|-------|------|------|----------------------------|-------|
| 2   | INH  | I     | 5   | 34/?  | 0.91 | 0.17 | 33,46,65,67                | 0     |
| 2   | INH  | I     | 4   | 34/?  | 0.92 | 0.13 | 29,34,40,42                | 0     |
| 2   | INH  | I     | 2   | 34/?  | 0.93 | 0.13 | 28,33,47,49                | 0     |
| 2   | INH  | I     | 3   | 34/?  | 0.93 | 0.15 | 32,45,70,71                | 0     |
| 3   | DMS  | K     | 1   | 4/?   | 0.93 | 0.21 | 76,79,80,81                | 0     |
| 3   | DMS  | K     | 2   | 4/?   | 0.94 | 0.20 | 78,81,81,83                | 0     |
| 2   | INH  | I     | 8   | 34/?  | 0.96 | 0.12 | 21,28,40,43                | 0     |
| 2   | INH  | I     | 7   | 34/?  | 0.96 | 0.11 | 25,36,42,43                | 0     |
| 2   | INH  | I     | 1   | 34/?  | 0.97 | 0.12 | 20,28,44,47                | 0     |
| 2   | INH  | I     | 6   | 34/?  | 0.97 | 0.12 | 24,32,43,43                | 0     |

## 6.5 Other polymers [i](#)

There are no such residues in this entry.



# Preliminary Full wwPDB X-ray Structure Validation Report ⓘ

Feb 20, 2019 – 12:59 pm GMT

Deposition ID : D\_1292100769  
PDB ID : *(not yet assigned)*

This is a Preliminary Full wwPDB X-ray Structure Validation Report.

This report is produced by the wwPDB Deposition System during initial deposition but before annotation of the structure.

We welcome your comments at [validation@mail.wwpdb.org](mailto:validation@mail.wwpdb.org)

A user guide is available at

<https://www.wwpdb.org/validation/2017/XrayValidationReportHelp>

with specific help available everywhere you see the ⓘ symbol.

---

The following versions of software and data (see [references ⓘ](#)) were used in the production of this report:

|                                |   |                                                                    |
|--------------------------------|---|--------------------------------------------------------------------|
| MolProbity                     | : | 4.02b-467                                                          |
| Xtrriage (Phenix)              | : | 1.13                                                               |
| EDS                            | : | 2.1                                                                |
| Percentile statistics          | : | 20171227.v01 (using entries in the PDB archive December 27th 2017) |
| Refmac                         | : | 5.8.0158                                                           |
| CCP4                           | : | 7.0 (Gargrove)                                                     |
| Ideal geometry (proteins)      | : | Engh & Huber (2001)                                                |
| Ideal geometry (DNA, RNA)      | : | Parkinson et al. (1996)                                            |
| Validation Pipeline (wwPDB-VP) | : | 2.1                                                                |

# 1 Overall quality at a glance i

The following experimental techniques were used to determine the structure:

*X-RAY DIFFRACTION*

The reported resolution of this entry is 2.80 Å.

Percentile scores (ranging between 0-100) for global validation metrics of the entry are shown in the following graphic. The table shows the number of entries on which the scores are based.

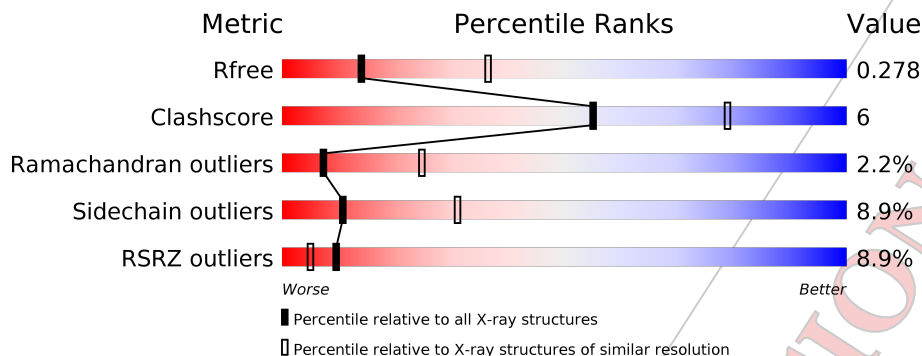

| Metric                | Whole archive<br>(#Entries) | Similar resolution<br>(#Entries, resolution range(Å)) |
|-----------------------|-----------------------------|-------------------------------------------------------|
| $R_{free}$            | 111664                      | 2792 (2.80-2.80)                                      |
| Clashscore            | 122126                      | 3209 (2.80-2.80)                                      |
| Ramachandran outliers | 120053                      | 3158 (2.80-2.80)                                      |
| Sidechain outliers    | 120020                      | 3160 (2.80-2.80)                                      |
| RSRZ outliers         | 108989                      | 2726 (2.80-2.80)                                      |

The table below summarises the geometric issues observed across the polymeric chains and their fit to the electron density. The red, orange, yellow and green segments on the lower bar indicate the fraction of residues that contain outliers for  $\geq 3$ , 2, 1 and 0 types of geometric quality criteria. A grey segment represents the fraction of residues that are not modelled. The numeric value for each fraction is indicated below the corresponding segment, with a dot representing fractions  $\leq 5\%$ . The upper red bar (where present) indicates the fraction of residues that have poor fit to the electron density. The numeric value is given above the bar.

| Mol | Chain | Length | Quality of chain                                                                                                                                                                                                                                                                                                                                                                                                                                                                  |
|-----|-------|--------|-----------------------------------------------------------------------------------------------------------------------------------------------------------------------------------------------------------------------------------------------------------------------------------------------------------------------------------------------------------------------------------------------------------------------------------------------------------------------------------|
| 1   | A     | 320    | <div style="display: flex; align-items: center;"> <div style="width: 6%; height: 10px; background-color: red; margin-right: 5px;"></div> <div style="width: 66%; height: 10px; background-color: green; margin-right: 5px;"></div> <div style="width: 17%; height: 10px; background-color: yellow; margin-right: 5px;"></div> <div style="width: 16%; height: 10px; background-color: grey;"></div> </div> <p style="margin-left: 10px;">6%      66%      17%      •      16%</p> |
| 1   | B     | 320    | <div style="display: flex; align-items: center;"> <div style="width: 9%; height: 10px; background-color: red; margin-right: 5px;"></div> <div style="width: 67%; height: 10px; background-color: green; margin-right: 5px;"></div> <div style="width: 18%; height: 10px; background-color: yellow; margin-right: 5px;"></div> <div style="width: 14%; height: 10px; background-color: grey;"></div> </div> <p style="margin-left: 10px;">9%      67%      18%      •      14%</p> |
| 1   | C     | 320    | <div style="display: flex; align-items: center;"> <div style="width: 8%; height: 10px; background-color: red; margin-right: 5px;"></div> <div style="width: 63%; height: 10px; background-color: green; margin-right: 5px;"></div> <div style="width: 19%; height: 10px; background-color: yellow; margin-right: 5px;"></div> <div style="width: 17%; height: 10px; background-color: grey;"></div> </div> <p style="margin-left: 10px;">8%      63%      19%      •      17%</p> |
| 1   | D     | 320    | <div style="display: flex; align-items: center;"> <div style="width: 7%; height: 10px; background-color: red; margin-right: 5px;"></div> <div style="width: 67%; height: 10px; background-color: green; margin-right: 5px;"></div> <div style="width: 14%; height: 10px; background-color: yellow; margin-right: 5px;"></div> <div style="width: 19%; height: 10px; background-color: grey;"></div> </div> <p style="margin-left: 10px;">7%      67%      14%      •      19%</p> |

## 2 Entry composition i

There are 3 unique types of molecules in this entry. The entry contains 8692 atoms, of which 0 are hydrogens and 0 are deuteriums.

In the tables below, the ZeroOcc column contains the number of atoms modelled with zero occupancy, the AltConf column contains the number of residues with at least one atom in alternate conformation and the Trace column contains the number of residues modelled with at most 2 atoms.

- Molecule 1 is a protein called GCN2.

| Mol | Chain | Residues | Atoms         |           |          |          |        | ZeroOcc | AltConf | Trace |
|-----|-------|----------|---------------|-----------|----------|----------|--------|---------|---------|-------|
|     |       |          | Total         | C         | N        | O        | S      |         |         |       |
| 1   | A     | 269      | Total<br>2124 | C<br>1365 | N<br>363 | O<br>388 | S<br>8 | 0       | 0       | 0     |
| 1   | B     | 275      | Total<br>2188 | C<br>1405 | N<br>376 | O<br>398 | S<br>9 | 0       | 0       | 0     |
| 1   | C     | 267      | Total<br>2133 | C<br>1364 | N<br>368 | O<br>393 | S<br>8 | 0       | 0       | 0     |
| 1   | D     | 260      | Total<br>2086 | C<br>1341 | N<br>361 | O<br>376 | S<br>8 | 0       | 0       | 0     |

- Molecule 2 is a ligand with the chemical component id INH but its atom names do not match the existing wwPDB Chemical Component Dictionary definition for INH. Consequently no firm identification of ligand chemistry can be made. Once the structure is annotated then an identification and diagram will be given here.

| Mol | Chain | Residues | Atoms       |         |        |        |        | ZeroOcc | AltConf |
|-----|-------|----------|-------------|---------|--------|--------|--------|---------|---------|
|     |       |          | Total       | C       | F      | N      | O      |         |         |
| 2   | I     | 1        | Total<br>29 | C<br>21 | F<br>1 | N<br>6 | O<br>1 | 0       | 0       |
| 2   | I     | 1        | Total<br>29 | C<br>21 | F<br>1 | N<br>6 | O<br>1 | 0       | 0       |
| 2   | I     | 1        | Total<br>29 | C<br>21 | F<br>1 | N<br>6 | O<br>1 | 0       | 0       |
| 2   | I     | 1        | Total<br>29 | C<br>21 | F<br>1 | N<br>6 | O<br>1 | 0       | 0       |

- Molecule 3 is water.

| Mol | Chain | Residues | Atoms       | ZeroOcc | AltConf |
|-----|-------|----------|-------------|---------|---------|
| 3   | W     | 45       | Total<br>45 | O<br>45 | 0       |





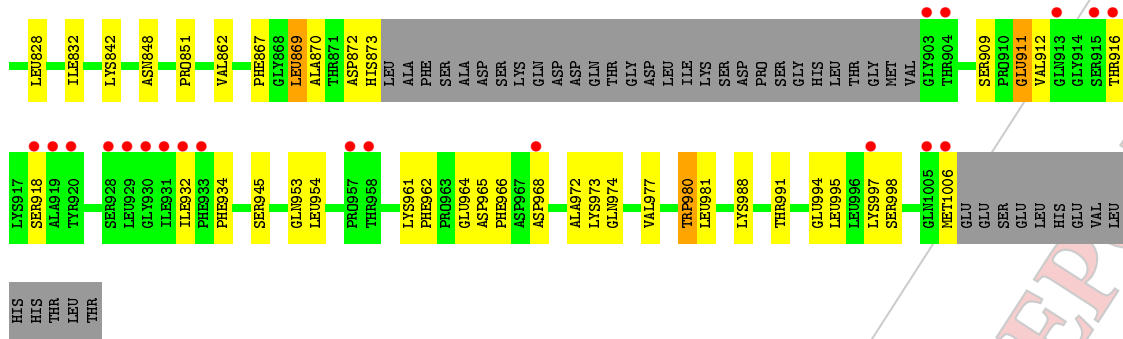

● Molecule 1: GCN2

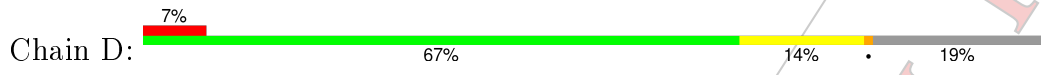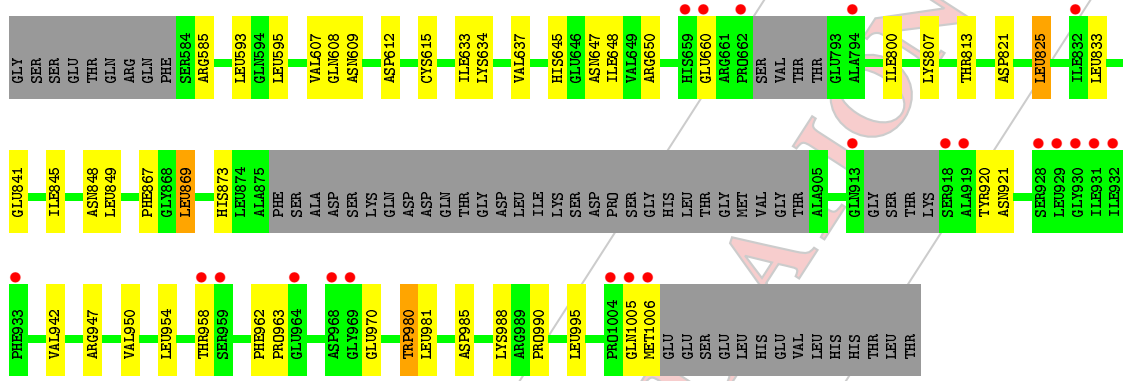

PRELIMINARY VALIDATION REPORT

## 4 Data and refinement statistics i

| Property                                                                | Value                                                       | Source           |
|-------------------------------------------------------------------------|-------------------------------------------------------------|------------------|
| Space group                                                             | C 2 2 21                                                    | Depositor        |
| Cell constants<br>a, b, c, $\alpha$ , $\beta$ , $\gamma$                | 155.42Å 162.60Å 123.89Å<br>90.00° 90.00° 90.00°             | Depositor        |
| Resolution (Å)                                                          | 24.64 – 2.80<br>24.64 – 2.80                                | Depositor<br>EDS |
| % Data completeness<br>(in resolution range)                            | 99.7 (24.64-2.80)<br>99.7 (24.64-2.80)                      | Depositor<br>EDS |
| $R_{merge}$                                                             | (Not available)                                             | Depositor        |
| $R_{sym}$                                                               | (Not available)                                             | Depositor        |
| $\langle I/\sigma(I) \rangle$ <sup>1</sup>                              | 1.36 (at 2.80Å)                                             | Xtrriage         |
| Refinement program                                                      | BUSTER 2.11.7                                               | Depositor        |
| R, $R_{free}$                                                           | 0.211 , 0.258<br>0.224 , 0.278                              | Depositor<br>DCC |
| $R_{free}$ test set                                                     | 1946 reflections (5.00%)                                    | wwPDB-VP         |
| Wilson B-factor (Å <sup>2</sup> )                                       | 92.5                                                        | Xtrriage         |
| Anisotropy                                                              | 0.204                                                       | Xtrriage         |
| Bulk solvent $k_{sol}$ (e/Å <sup>3</sup> ), $B_{sol}$ (Å <sup>2</sup> ) | 0.32 , 70.7                                                 | EDS              |
| L-test for twinning <sup>2</sup>                                        | $\langle  L  \rangle = 0.49$ , $\langle L^2 \rangle = 0.32$ | Xtrriage         |
| Estimated twinning fraction                                             | 0.062 for -k,-h,-l                                          | Xtrriage         |
| $F_o, F_c$ correlation                                                  | 0.94                                                        | EDS              |
| Total number of atoms                                                   | 8692                                                        | wwPDB-VP         |
| Average B, all atoms (Å <sup>2</sup> )                                  | 91.0                                                        | wwPDB-VP         |

Xtrriage's analysis on translational NCS is as follows: *The largest off-origin peak in the Patterson function is 4.35% of the height of the origin peak. No significant pseudotranslation is detected.*

<sup>1</sup> Intensities estimated from amplitudes.

<sup>2</sup> Theoretical values of  $\langle |L| \rangle$ ,  $\langle L^2 \rangle$  for acentric reflections are 0.5, 0.333 respectively for untwinned datasets, and 0.375, 0.2 for perfectly twinned datasets.

## 5 Model quality [i](#)

### 5.1 Standard geometry [i](#)

Bond lengths and bond angles in the following residue types are not validated in this section: INH

The Z score for a bond length (or angle) is the number of standard deviations the observed value is removed from the expected value. A bond length (or angle) with  $|Z| > 5$  is considered an outlier worth inspection. RMSZ is the root-mean-square of all Z scores of the bond lengths (or angles).

| Mol | Chain | Bond lengths |         | Bond angles |         |
|-----|-------|--------------|---------|-------------|---------|
|     |       | RMSZ         | # Z  >5 | RMSZ        | # Z  >5 |
| 1   | A     | 0.51         | 0/2175  | 0.76        | 0/2950  |
| 1   | B     | 0.50         | 0/2240  | 0.74        | 0/3034  |
| 1   | C     | 0.50         | 0/2183  | 0.75        | 0/2960  |
| 1   | D     | 0.54         | 0/2136  | 0.76        | 0/2893  |
| All | All   | 0.51         | 0/8734  | 0.75        | 0/11837 |

There are no bond length outliers.

There are no bond angle outliers.

There are no chirality outliers.

There are no planarity outliers.

### 5.2 Too-close contacts [i](#)

In the following table, the Non-H and H(model) columns list the number of non-hydrogen atoms and hydrogen atoms in the chain respectively. The H(added) column lists the number of hydrogen atoms added and optimized by MolProbity. The Clashes column lists the number of clashes within the asymmetric unit, whereas Symm-Clashes lists symmetry related clashes.

| Mol | Chain | Non-H | H(model) | H(added) | Clashes | Symm-Clashes |
|-----|-------|-------|----------|----------|---------|--------------|
| 1   | A     | 2124  | 0        | 2052     | 23      | 0            |
| 1   | B     | 2188  | 0        | 2147     | 24      | 0            |
| 1   | C     | 2133  | 0        | 2073     | 32      | 0            |
| 1   | D     | 2086  | 0        | 2028     | 17      | 0            |
| 2   | I     | 116   | 0        | 4        | 4       | 0            |
| 3   | W     | 45    | 0        | 0        | 1       | 0            |
| All | All   | 8692  | 0        | 8304     | 95      | 0            |

The all-atom clashscore is defined as the number of clashes found per 1000 atoms (including hydrogen atoms). The all-atom clashscore for this structure is 6.

All (95) close contacts within the same asymmetric unit are listed below, sorted by their clash magnitude.

| Atom-1           | Atom-2           | Interatomic distance (Å) | Clash overlap (Å) |
|------------------|------------------|--------------------------|-------------------|
| 1:C:650:ARG:HG2  | 1:C:650:ARG:HH11 | 1.32                     | 0.92              |
| 1:A:645:HIS:HB3  | 1:A:648:ILE:HG12 | 1.55                     | 0.89              |
| 1:C:645:HIS:HB3  | 1:C:648:ILE:HG12 | 1.64                     | 0.80              |
| 1:B:645:HIS:HB3  | 1:B:648:ILE:HG12 | 1.62                     | 0.79              |
| 1:B:645:HIS:HD2  | 1:B:647:ASN:H    | 1.31                     | 0.76              |
| 1:A:645:HIS:HD2  | 1:A:647:ASN:H    | 1.33                     | 0.76              |
| 1:A:944:ALA:O    | 1:A:948:ILE:HG12 | 1.90                     | 0.71              |
| 1:A:645:HIS:CD2  | 1:A:647:ASN:H    | 2.11                     | 0.69              |
| 1:C:609:ASN:HD22 | 1:C:612:ASP:H    | 1.41                     | 0.68              |
| 1:C:650:ARG:HG2  | 1:C:650:ARG:NH1  | 2.09                     | 0.68              |
| 1:D:609:ASN:HD22 | 1:D:612:ASP:H    | 1.43                     | 0.65              |
| 1:A:650:ARG:NH2  | 1:D:650:ARG:HB3  | 2.12                     | 0.64              |
| 1:B:944:ALA:O    | 1:B:948:ILE:HG12 | 1.98                     | 0.63              |
| 1:C:595:LEU:HD21 | 1:C:598:LYS:HB2  | 1.82                     | 0.62              |
| 1:C:645:HIS:CD2  | 1:C:647:ASN:H    | 2.18                     | 0.62              |
| 1:C:645:HIS:HD2  | 1:C:647:ASN:H    | 1.48                     | 0.61              |
| 1:D:645:HIS:HB3  | 1:D:648:ILE:HG12 | 1.83                     | 0.61              |
| 1:A:609:ASN:HD22 | 1:A:612:ASP:H    | 1.50                     | 0.60              |
| 1:C:980:TRP:HZ3  | 1:C:988:LYS:O    | 1.86                     | 0.58              |
| 1:D:821:ASP:O    | 1:D:825:LEU:HB2  | 2.03                     | 0.58              |
| 1:A:923:LYS:HA   | 1:A:926:LEU:HD12 | 1.86                     | 0.58              |
| 1:B:609:ASN:HD22 | 1:B:612:ASP:H    | 1.50                     | 0.58              |
| 1:B:916:THR:HG23 | 1:B:919:ALA:HB3  | 1.87                     | 0.56              |
| 1:B:609:ASN:HB3  | 1:B:612:ASP:OD1  | 2.06                     | 0.55              |
| 1:A:890:ILE:HD13 | 1:A:948:ILE:HG21 | 1.88                     | 0.55              |
| 1:D:593:LEU:HD11 | 1:D:608:GLN:HB2  | 1.88                     | 0.55              |
| 1:C:828:LEU:O    | 1:C:832:ILE:HG13 | 2.07                     | 0.55              |
| 1:D:607:VAL:O    | 1:D:615:CYS:HA   | 2.07                     | 0.54              |
| 1:D:645:HIS:HD2  | 1:D:647:ASN:H    | 1.54                     | 0.54              |
| 1:B:818:LEU:HD23 | 1:B:936:MET:HG2  | 1.89                     | 0.54              |
| 1:C:595:LEU:HD12 | 1:C:605:ILE:HG23 | 1.89                     | 0.54              |
| 1:B:657:GLU:HB2  | 1:B:799:TYR:HE1  | 1.73                     | 0.53              |
| 1:C:848:ASN:HB2  | 1:C:869:LEU:HD11 | 1.90                     | 0.53              |
| 1:B:662:PRO:HG3  | 1:B:793:GLU:HA   | 1.90                     | 0.53              |
| 1:C:851:PRO:HD3  | 1:C:932:ILE:HG12 | 1.91                     | 0.52              |
| 1:B:825:LEU:HD11 | 1:B:937:SER:HA   | 1.90                     | 0.52              |
| 1:B:585:ARG:HD2  | 1:C:585:ARG:HD2  | 1.91                     | 0.52              |
| 1:A:609:ASN:HB3  | 1:A:612:ASP:OD1  | 2.10                     | 0.52              |
| 1:A:640:LEU:HA   | 1:A:643:LEU:HD12 | 1.92                     | 0.52              |
| 1:A:833:LEU:HD11 | 1:A:995:LEU:HD23 | 1.92                     | 0.51              |

Continued on next page...

Continued from previous page...

| Atom-1           | Atom-2           | Interatomic distance (Å) | Clash overlap (Å) |
|------------------|------------------|--------------------------|-------------------|
| 1:C:586:TYR:OH   | 1:C:605:ILE:HG13 | 2.11                     | 0.51              |
| 1:D:980:TRP:CE3  | 1:D:990:PRO:HD3  | 2.45                     | 0.50              |
| 1:C:977:VAL:HG13 | 1:C:995:LEU:HD11 | 1.94                     | 0.50              |
| 1:A:910:PRO:HA   | 1:A:913:GLN:HE21 | 1.77                     | 0.50              |
| 1:A:980:TRP:CD1  | 1:A:990:PRO:HD3  | 2.46                     | 0.50              |
| 1:B:645:HIS:CD2  | 1:B:647:ASN:H    | 2.20                     | 0.50              |
| 1:C:909:SER:HB2  | 1:C:912:VAL:HG23 | 1.94                     | 0.49              |
| 1:D:981:LEU:HD21 | 1:D:995:LEU:HD22 | 1.94                     | 0.48              |
| 1:B:833:LEU:HD11 | 1:B:995:LEU:HD23 | 1.96                     | 0.48              |
| 1:C:980:TRP:CZ3  | 1:C:988:LYS:O    | 2.67                     | 0.47              |
| 1:C:981:LEU:HD21 | 1:C:995:LEU:HD22 | 1.96                     | 0.47              |
| 1:B:961:LYS:O    | 1:B:962:PHE:HB2  | 2.15                     | 0.47              |
| 1:D:833:LEU:HD11 | 1:D:995:LEU:HD23 | 1.97                     | 0.47              |
| 1:C:619:LYS:HG2  | 1:C:621:ILE:HD11 | 1.97                     | 0.47              |
| 1:C:828:LEU:HD22 | 1:C:862:VAL:HG23 | 1.97                     | 0.47              |
| 1:A:828:LEU:O    | 1:A:832:ILE:HG13 | 2.16                     | 0.45              |
| 1:A:611:LEU:HD12 | 1:D:634:LYS:HE2  | 1.97                     | 0.45              |
| 2:I:1:INH:N5     | 2:I:1:INH:N2     | 2.64                     | 0.45              |
| 1:C:911:GLU:HB3  | 1:C:918:SER:HB2  | 1.97                     | 0.45              |
| 1:D:950:VAL:HG13 | 1:D:963:PRO:HG3  | 1.98                     | 0.45              |
| 1:B:593:LEU:HD12 | 1:B:606:LYS:HE2  | 1.99                     | 0.45              |
| 1:B:611:LEU:HD12 | 1:C:634:LYS:HE2  | 1.99                     | 0.45              |
| 1:A:957:PRO:HB3  | 1:A:984:HIS:CD2  | 2.52                     | 0.44              |
| 1:C:973:LYS:O    | 1:C:977:VAL:HG23 | 2.16                     | 0.44              |
| 1:C:639:LEU:HB2  | 1:C:867:PHE:HE2  | 1.81                     | 0.44              |
| 2:I:4:INH:N5     | 2:I:4:INH:N2     | 2.64                     | 0.44              |
| 1:C:649:VAL:HG13 | 1:C:803:GLU:HG2  | 2.00                     | 0.44              |
| 1:D:645:HIS:CD2  | 1:D:647:ASN:H    | 2.34                     | 0.43              |
| 1:C:968:ASP:O    | 1:C:972:ALA:HB2  | 2.18                     | 0.43              |
| 1:B:836:LEU:HD11 | 1:B:925:ASP:HB3  | 2.01                     | 0.43              |
| 1:C:645:HIS:HB3  | 1:C:648:ILE:CG1  | 2.42                     | 0.43              |
| 1:C:991:THR:H    | 1:C:994:GLU:HB3  | 1.83                     | 0.43              |
| 2:I:2:INH:N5     | 2:I:2:INH:N2     | 2.66                     | 0.43              |
| 1:A:960:PRO:HB2  | 3:W:27:HOH:O     | 2.18                     | 0.43              |
| 1:A:909:SER:HB2  | 1:A:924:VAL:HG13 | 2.02                     | 0.42              |
| 1:B:912:VAL:HA   | 1:B:919:ALA:HB1  | 2.02                     | 0.42              |
| 1:B:906:LEU:O    | 1:B:955:ARG:HD2  | 2.18                     | 0.42              |
| 1:B:898:LEU:HD13 | 1:B:948:ILE:HB   | 2.01                     | 0.42              |
| 1:C:604:VAL:HG22 | 1:C:619:LYS:HG3  | 2.01                     | 0.42              |
| 1:D:833:LEU:HD21 | 1:D:995:LEU:HD23 | 2.01                     | 0.42              |
| 1:B:851:PRO:HD3  | 1:B:932:ILE:HG12 | 2.02                     | 0.42              |

Continued on next page...

Continued from previous page...

| Atom-1           | Atom-2           | Interatomic distance (Å) | Clash overlap (Å) |
|------------------|------------------|--------------------------|-------------------|
| 1:C:609:ASN:ND2  | 1:C:612:ASP:H    | 2.11                     | 0.41              |
| 1:D:633:ILE:O    | 1:D:637:VAL:HG23 | 2.21                     | 0.41              |
| 1:B:832:ILE:HG12 | 1:B:862:VAL:HG11 | 2.03                     | 0.41              |
| 1:A:657:GLU:HB2  | 1:A:799:TYR:HE1  | 1.85                     | 0.41              |
| 1:D:985:ASP:HB3  | 1:D:988:LYS:HG2  | 2.02                     | 0.41              |
| 1:C:934:PHE:CG   | 1:C:954:LEU:HD21 | 2.56                     | 0.41              |
| 1:A:809:THR:HG22 | 1:A:855:PHE:CD1  | 2.55                     | 0.41              |
| 1:A:938:TYR:HD1  | 1:A:966:PHE:HD1  | 1.67                     | 0.40              |
| 1:B:807:LYS:HE2  | 1:B:860:ASP:HB2  | 2.03                     | 0.40              |
| 1:C:606:LYS:HD2  | 1:C:804:TYR:CZ   | 2.56                     | 0.40              |
| 1:A:585:ARG:HD2  | 1:D:585:ARG:HD2  | 2.04                     | 0.40              |
| 1:A:902:VAL:HG23 | 1:A:948:ILE:HD12 | 2.02                     | 0.40              |
| 2:I:3:INH:N2     | 2:I:3:INH:N5     | 2.65                     | 0.40              |
| 1:B:586:TYR:OH   | 1:B:605:ILE:HG13 | 2.22                     | 0.40              |

There are no symmetry-related clashes.

## 5.3 Torsion angles [i](#)

### 5.3.1 Protein backbone [i](#)

In the following table, the Percentiles column shows the percent Ramachandran outliers of the chain as a percentile score with respect to all X-ray entries followed by that with respect to entries of similar resolution.

The Analysed column shows the number of residues for which the backbone conformation was analysed, and the total number of residues.

| Mol | Chain | Analysed        | Favoured  | Allowed  | Outliers | Percentiles |    |
|-----|-------|-----------------|-----------|----------|----------|-------------|----|
| 1   | A     | 263/320 (82%)   | 240 (91%) | 19 (7%)  | 4 (2%)   | 11          | 36 |
| 1   | B     | 269/320 (84%)   | 237 (88%) | 24 (9%)  | 8 (3%)   | 5           | 16 |
| 1   | C     | 261/320 (82%)   | 229 (88%) | 27 (10%) | 5 (2%)   | 9           | 28 |
| 1   | D     | 252/320 (79%)   | 229 (91%) | 17 (7%)  | 6 (2%)   | 6           | 22 |
| All | All   | 1045/1280 (82%) | 935 (90%) | 87 (8%)  | 23 (2%)  | 7           | 25 |

All (23) Ramachandran outliers are listed below:

| Mol | Chain | Res | Type |
|-----|-------|-----|------|
| 1   | A     | 919 | ALA  |

Continued on next page...

Continued from previous page...

| Mol | Chain | Res | Type |
|-----|-------|-----|------|
| 1   | A     | 961 | LYS  |
| 1   | A     | 972 | ALA  |
| 1   | C     | 870 | ALA  |
| 1   | D     | 869 | LEU  |
| 1   | B     | 807 | LYS  |
| 1   | B     | 819 | TYR  |
| 1   | C     | 872 | ASP  |
| 1   | D     | 660 | GLU  |
| 1   | A     | 962 | PHE  |
| 1   | B     | 794 | ALA  |
| 1   | B     | 961 | LYS  |
| 1   | B     | 919 | ALA  |
| 1   | C     | 627 | SER  |
| 1   | C     | 962 | PHE  |
| 1   | D     | 867 | PHE  |
| 1   | D     | 920 | TYR  |
| 1   | D     | 954 | LEU  |
| 1   | B     | 817 | GLY  |
| 1   | B     | 967 | ASP  |
| 1   | C     | 961 | LYS  |
| 1   | B     | 962 | PHE  |
| 1   | D     | 962 | PHE  |

### 5.3.2 Protein sidechains [i](#)

In the following table, the Percentiles column shows the percent sidechain outliers of the chain as a percentile score with respect to all X-ray entries followed by that with respect to entries of similar resolution.

The Analysed column shows the number of residues for which the sidechain conformation was analysed, and the total number of residues.

| Mol | Chain | Analysed         | Rotameric | Outliers | Percentiles |
|-----|-------|------------------|-----------|----------|-------------|
| 1   | A     | 224 / 286 (78%)  | 204 (91%) | 20 (9%)  | 11 31       |
| 1   | B     | 235 / 286 (82%)  | 215 (92%) | 20 (8%)  | 12 33       |
| 1   | C     | 228 / 286 (80%)  | 206 (90%) | 22 (10%) | 9 27        |
| 1   | D     | 221 / 286 (77%)  | 202 (91%) | 19 (9%)  | 11 33       |
| All | All   | 908 / 1144 (79%) | 827 (91%) | 81 (9%)  | 11 31       |

All (81) residues with a non-rotameric sidechain are listed below:



| Mol | Chain | Res  | Type |
|-----|-------|------|------|
| 1   | A     | 605  | ILE  |
| 1   | A     | 608  | GLN  |
| 1   | A     | 649  | VAL  |
| 1   | A     | 806  | GLU  |
| 1   | A     | 807  | LYS  |
| 1   | A     | 825  | LEU  |
| 1   | A     | 841  | GLU  |
| 1   | A     | 849  | LEU  |
| 1   | A     | 858  | SER  |
| 1   | A     | 867  | PHE  |
| 1   | A     | 889  | LEU  |
| 1   | A     | 899  | THR  |
| 1   | A     | 911  | GLU  |
| 1   | A     | 916  | THR  |
| 1   | A     | 917  | LYS  |
| 1   | A     | 928  | SER  |
| 1   | A     | 948  | ILE  |
| 1   | A     | 956  | ASP  |
| 1   | A     | 965  | ASP  |
| 1   | A     | 984  | HIS  |
| 1   | B     | 591  | GLU  |
| 1   | B     | 605  | ILE  |
| 1   | B     | 608  | GLN  |
| 1   | B     | 642  | ARG  |
| 1   | B     | 649  | VAL  |
| 1   | B     | 798  | LEU  |
| 1   | B     | 803  | GLU  |
| 1   | B     | 807  | LYS  |
| 1   | B     | 822  | THR  |
| 1   | B     | 867  | PHE  |
| 1   | B     | 899  | THR  |
| 1   | B     | 909  | SER  |
| 1   | B     | 926  | LEU  |
| 1   | B     | 942  | VAL  |
| 1   | B     | 965  | ASP  |
| 1   | B     | 966  | PHE  |
| 1   | B     | 968  | ASP  |
| 1   | B     | 980  | TRP  |
| 1   | B     | 1005 | GLN  |
| 1   | B     | 1006 | MET  |
| 1   | C     | 605  | ILE  |
| 1   | C     | 642  | ARG  |
| 1   | C     | 650  | ARG  |

*Continued on next page...*

*Continued from previous page...*

| Mol | Chain | Res  | Type |
|-----|-------|------|------|
| 1   | C     | 653  | ASN  |
| 1   | C     | 791  | THR  |
| 1   | C     | 813  | THR  |
| 1   | C     | 822  | THR  |
| 1   | C     | 842  | LYS  |
| 1   | C     | 869  | LEU  |
| 1   | C     | 873  | HIS  |
| 1   | C     | 911  | GLU  |
| 1   | C     | 916  | THR  |
| 1   | C     | 945  | SER  |
| 1   | C     | 953  | GLN  |
| 1   | C     | 964  | GLU  |
| 1   | C     | 965  | ASP  |
| 1   | C     | 966  | PHE  |
| 1   | C     | 974  | GLN  |
| 1   | C     | 980  | TRP  |
| 1   | C     | 997  | LYS  |
| 1   | C     | 998  | SER  |
| 1   | C     | 1006 | MET  |
| 1   | D     | 595  | LEU  |
| 1   | D     | 800  | ILE  |
| 1   | D     | 807  | LYS  |
| 1   | D     | 813  | THR  |
| 1   | D     | 825  | LEU  |
| 1   | D     | 841  | GLU  |
| 1   | D     | 845  | ILE  |
| 1   | D     | 848  | ASN  |
| 1   | D     | 849  | LEU  |
| 1   | D     | 869  | LEU  |
| 1   | D     | 873  | HIS  |
| 1   | D     | 921  | ASN  |
| 1   | D     | 942  | VAL  |
| 1   | D     | 947  | ARG  |
| 1   | D     | 958  | THR  |
| 1   | D     | 970  | GLU  |
| 1   | D     | 980  | TRP  |
| 1   | D     | 1005 | GLN  |
| 1   | D     | 1006 | MET  |

Some sidechains can be flipped to improve hydrogen bonding and reduce clashes. All (13) such sidechains are listed below:

| Mol | Chain | Res | Type |
|-----|-------|-----|------|
| 1   | A     | 609 | ASN  |
| 1   | A     | 645 | HIS  |
| 1   | A     | 913 | GLN  |
| 1   | A     | 984 | HIS  |
| 1   | B     | 609 | ASN  |
| 1   | B     | 645 | HIS  |
| 1   | C     | 609 | ASN  |
| 1   | C     | 645 | HIS  |
| 1   | D     | 609 | ASN  |
| 1   | D     | 645 | HIS  |
| 1   | D     | 659 | HIS  |
| 1   | D     | 848 | ASN  |
| 1   | D     | 921 | ASN  |

### 5.3.3 RNA [i](#)

There are no RNA molecules in this entry.

### 5.4 Non-standard residues in protein, DNA, RNA chains [i](#)

There are no non-standard protein/DNA/RNA residues in this entry.

### 5.5 Carbohydrates [i](#)

There are no carbohydrates in this entry.

### 5.6 Ligand geometry [i](#)

Of 4 ligands modelled in this entry, 4 could not be matched to an existing wwPDB Chemical Component Dictionary definition at this stage - leaving 0 for Mogul analysis.

There are no bond length outliers.

There are no bond angle outliers.

There are no chirality outliers.

There are no torsion outliers.

There are no ring outliers.

No monomer is involved in short contacts.

## 5.7 Other polymers [i](#)

There are no such residues in this entry.

## 5.8 Polymer linkage issues [i](#)

There are no chain breaks in this entry.

PRELIMINARY VALIDATION REPORT

## 6 Fit of model and data [i](#)

### 6.1 Protein, DNA and RNA chains [i](#)

In the following table, the column labelled '#RSRZ > 2' contains the number (and percentage) of RSRZ outliers, followed by percent RSRZ outliers for the chain as percentile scores relative to all X-ray entries and entries of similar resolution. The OWAB column contains the minimum, median, 95<sup>th</sup> percentile and maximum values of the occupancy-weighted average B-factor per residue. The column labelled 'Q < 0.9' lists the number of (and percentage) of residues with an average occupancy less than 0.9.

| Mol | Chain | Analysed        | <RSRZ> | #RSRZ > 2    | OWAB(Å <sup>2</sup> ) | Q < 0.9 |
|-----|-------|-----------------|--------|--------------|-----------------------|---------|
| 1   | A     | 269/320 (84%)   | 0.19   | 19 (7%) 16 9 | 57, 82, 115, 145      | 0       |
| 1   | B     | 275/320 (85%)   | 0.35   | 29 (10%) 6 3 | 62, 88, 125, 150      | 0       |
| 1   | C     | 267/320 (83%)   | 0.45   | 25 (9%) 8 4  | 65, 89, 132, 175      | 0       |
| 1   | D     | 260/320 (81%)   | 0.40   | 22 (8%) 11 5 | 62, 92, 139, 167      | 0       |
| All | All   | 1071/1280 (83%) | 0.35   | 95 (8%) 9 5  | 57, 88, 130, 175      | 0       |

All (95) RSRZ outliers are listed below:

| Mol | Chain | Res  | Type | RSRZ |
|-----|-------|------|------|------|
| 1   | C     | 916  | THR  | 9.1  |
| 1   | A     | 662  | PRO  | 7.7  |
| 1   | C     | 1006 | MET  | 7.4  |
| 1   | C     | 1005 | GLN  | 7.1  |
| 1   | B     | 1006 | MET  | 6.7  |
| 1   | D     | 1005 | GLN  | 6.1  |
| 1   | D     | 1006 | MET  | 5.9  |
| 1   | B     | 1005 | GLN  | 5.1  |
| 1   | D     | 958  | THR  | 4.7  |
| 1   | D     | 930  | GLY  | 4.5  |
| 1   | B     | 917  | LYS  | 4.5  |
| 1   | D     | 919  | ALA  | 4.4  |
| 1   | B     | 600  | ALA  | 4.2  |
| 1   | A     | 659  | HIS  | 4.1  |
| 1   | D     | 1004 | PRO  | 4.0  |
| 1   | D     | 959  | SER  | 4.0  |
| 1   | C     | 932  | ILE  | 4.0  |
| 1   | A     | 795  | VAL  | 4.0  |
| 1   | C     | 919  | ALA  | 4.0  |
| 1   | D     | 932  | ILE  | 3.9  |
| 1   | A     | 600  | ALA  | 3.9  |

*Continued on next page...*

*Continued from previous page...*

| Mol | Chain | Res | Type | RSRZ |
|-----|-------|-----|------|------|
| 1   | A     | 660 | GLU  | 3.7  |
| 1   | A     | 929 | LEU  | 3.7  |
| 1   | B     | 959 | SER  | 3.7  |
| 1   | B     | 929 | LEU  | 3.7  |
| 1   | B     | 919 | ALA  | 3.7  |
| 1   | A     | 915 | SER  | 3.6  |
| 1   | B     | 794 | ALA  | 3.5  |
| 1   | B     | 662 | PRO  | 3.5  |
| 1   | A     | 918 | SER  | 3.4  |
| 1   | B     | 958 | THR  | 3.4  |
| 1   | C     | 903 | GLY  | 3.4  |
| 1   | B     | 970 | GLU  | 3.3  |
| 1   | D     | 929 | LEU  | 3.3  |
| 1   | B     | 823 | VAL  | 3.2  |
| 1   | A     | 661 | ARG  | 3.1  |
| 1   | C     | 968 | ASP  | 3.1  |
| 1   | B     | 661 | ARG  | 3.0  |
| 1   | B     | 914 | GLY  | 2.9  |
| 1   | C     | 958 | THR  | 2.9  |
| 1   | C     | 928 | SER  | 2.8  |
| 1   | D     | 660 | GLU  | 2.8  |
| 1   | B     | 932 | ILE  | 2.8  |
| 1   | B     | 601 | PHE  | 2.8  |
| 1   | A     | 928 | SER  | 2.8  |
| 1   | A     | 959 | SER  | 2.8  |
| 1   | B     | 931 | ILE  | 2.8  |
| 1   | B     | 625 | PRO  | 2.7  |
| 1   | B     | 891 | LYS  | 2.7  |
| 1   | C     | 929 | LEU  | 2.7  |
| 1   | C     | 790 | VAL  | 2.6  |
| 1   | D     | 794 | ALA  | 2.6  |
| 1   | D     | 969 | GLY  | 2.6  |
| 1   | A     | 932 | ILE  | 2.6  |
| 1   | A     | 930 | GLY  | 2.5  |
| 1   | C     | 913 | GLN  | 2.5  |
| 1   | D     | 918 | SER  | 2.5  |
| 1   | B     | 915 | SER  | 2.5  |
| 1   | B     | 660 | GLU  | 2.5  |
| 1   | B     | 930 | GLY  | 2.5  |
| 1   | A     | 931 | ILE  | 2.4  |
| 1   | A     | 914 | GLY  | 2.4  |
| 1   | D     | 913 | GLN  | 2.4  |

*Continued on next page...*

Continued from previous page...

| Mol | Chain | Res | Type | RSRZ |
|-----|-------|-----|------|------|
| 1   | B     | 599 | GLY  | 2.4  |
| 1   | B     | 928 | SER  | 2.4  |
| 1   | D     | 662 | PRO  | 2.3  |
| 1   | D     | 968 | ASP  | 2.3  |
| 1   | C     | 920 | TYR  | 2.3  |
| 1   | C     | 957 | PRO  | 2.3  |
| 1   | B     | 918 | SER  | 2.3  |
| 1   | D     | 928 | SER  | 2.3  |
| 1   | C     | 997 | LYS  | 2.3  |
| 1   | D     | 964 | GLU  | 2.3  |
| 1   | D     | 832 | ILE  | 2.3  |
| 1   | C     | 792 | THR  | 2.3  |
| 1   | C     | 930 | GLY  | 2.3  |
| 1   | B     | 916 | THR  | 2.2  |
| 1   | D     | 659 | HIS  | 2.2  |
| 1   | C     | 915 | SER  | 2.2  |
| 1   | D     | 933 | PHE  | 2.2  |
| 1   | C     | 661 | ARG  | 2.2  |
| 1   | C     | 918 | SER  | 2.1  |
| 1   | A     | 933 | PHE  | 2.1  |
| 1   | C     | 660 | GLU  | 2.1  |
| 1   | D     | 931 | ILE  | 2.1  |
| 1   | A     | 894 | PRO  | 2.1  |
| 1   | B     | 602 | GLY  | 2.1  |
| 1   | C     | 662 | PRO  | 2.1  |
| 1   | A     | 916 | THR  | 2.1  |
| 1   | C     | 904 | THR  | 2.1  |
| 1   | A     | 796 | HIS  | 2.0  |
| 1   | B     | 795 | VAL  | 2.0  |
| 1   | C     | 931 | ILE  | 2.0  |
| 1   | B     | 933 | PHE  | 2.0  |
| 1   | C     | 933 | PHE  | 2.0  |

## 6.2 Non-standard residues in protein, DNA, RNA chains [i](#)

There are no non-standard protein/DNA/RNA residues in this entry.

## 6.3 Carbohydrates [i](#)

There are no carbohydrates in this entry.

## 6.4 Ligands [i](#)

In the following table, the Atoms column lists the number of modelled atoms in the group and the number defined in the chemical component dictionary. The B-factors column lists the minimum, median, 95<sup>th</sup> percentile and maximum values of B factors of atoms in the group. The column labelled 'Q< 0.9' lists the number of atoms with occupancy less than 0.9.

| Mol | Type | Chain | Res | Atoms | RSCC | RSR  | B-factors(Å <sup>2</sup> ) | Q<0.9 |
|-----|------|-------|-----|-------|------|------|----------------------------|-------|
| 2   | INH  | I     | 1   | 29/?  | 0.87 | 0.22 | 66,80,109,109              | 0     |
| 2   | INH  | I     | 4   | 29/?  | 0.87 | 0.22 | 66,79,115,117              | 0     |
| 2   | INH  | I     | 2   | 29/?  | 0.92 | 0.19 | 58,69,102,102              | 0     |
| 2   | INH  | I     | 3   | 29/?  | 0.93 | 0.19 | 72,83,117,119              | 0     |

## 6.5 Other polymers [i](#)

There are no such residues in this entry.
